# Supplementary material for: Biochemical Basis of Xylooligosaccharide Utilisation by Gut Bacteria
Source: MDPI journal article supplement (doi:10.3390/ijms23062992), 2022-03-10
Supplement: s1 [file s1]

# **Biochemical basis of xylooligosaccharide utilisation by gut bacteria**

**Ravindra Pal Singh<sup>1,2\*</sup>, Raja Bhaiyya<sup>1</sup>, Raksha Thakur<sup>1</sup>, Jayashree Niharika<sup>1</sup>, Chandrajeet Singh<sup>1,†</sup>,  
Dimitrios Latousakis<sup>3</sup>, Gerhard Saalbach<sup>2</sup>, Sergey A. Nepogodiev<sup>2</sup>, Parveen Singh<sup>4</sup>, Sukesh Chander  
Sharma<sup>5</sup>, Shantanu Sengupta<sup>4</sup>, Nathalie Juge<sup>3</sup> and Robert A Field<sup>2,\*‡</sup>**

1. Division of Food and Nutritional Biotechnology, National Agri-Food Biotechnology Institute (NABI), SAS Nagar, Punjab, 140306, India
2. Department of Biological Chemistry, John Innes Centre, Norwich Research Park, Norwich, NR47UH, UK
3. The Gut Microbes and Health Institute Strategic Programme, Quadram Institute Bioscience, Norwich Research Park, Norwich NR4 7UQ, UK
4. CSIR-Institute of Genomics and Integrative Biology, Mathura Road, New Delhi, 110025, India
5. Department of Biochemistry, Panjab University South Campus, Chandigarh, 160014, India

<sup>†</sup>Present address: Department of Biochemistry and Molecular Genetics, University of Virginia, Charlottesville, VA 22908 USA

<sup>§</sup>Present address: Department of Chemistry and Manchester Institute of Biotechnology, The University of Manchester, 131 Princess Street, Manchester M1 7DN, UK

**\*For corresponding authors:**

**Dr. Ravindra Pal Singh:** r.p.singh@nabi.res.in

**Prof. Robert A Field:** robert.field@manchester.ac.uk

## **1. Proteomics of *L. reuteri* ATCC 100-23C, *L. reuteri* ATCC 53608 and *B. producta* ATCC 27340**

### **1.1. Proteomics for *L. reuteri* strains**

Total intracellular proteins from *L. reuteri* strains were precipitated from 200 µl of the above-prepared supernatant using methanol/chloroform (Wessel & Flugge, 1984). The pellets were dissolved in 140 µl of 20 mM sodium phosphate buffer (pH8) containing 1% sodium deoxycholate (SDC). Samples of ~50 µg proteins were mixed with 4 µl of 25 mM dithiothreitol (DTT) and incubated at 60 °C for 30 min. Alkylation of protein was carried out by adding 3 µl of 50 mM iodoacetamide (IAA) and then incubated for 15 min in the dark at RT. Trypsin digestion of protein was achieved by adding 5 µg trypsin (MS grade, Promega) to the above mixture and incubation at 37 °C for 16-18 h. Next, samples were diluted 1:1 with 2% (w/v) trifluoroacetic acid (TFA) to quench enzymatic activity and peptides were processed for mass spectrometry analysis. The SDC was removed by acid precipitation with 5% formic acid.

The *L. reuteri* peptides were analysed by nano LC-MS/MS on an Orbitrap Fusion™ Tribrid™ mass spectrometer coupled to an UltiMate® 3000 RSLCnano LC system (Thermo Fisher Scientific, Hemel Hempstead, UK). Briefly, the samples were loaded and trapped using a pre-column with 0.1% TFA at 20 µl min<sup>-1</sup> for 3 min. The trap column was then switched in-line with the analytical column (nanoEase M/Z column, HSS C18 T3, 100 Å, 1.8 µm; Waters, Wilmslow, UK) for separation, using the following gradient of solvents A (water, 0.05% formic acid) and B (80% acetonitrile, 0.05% formic acid) at a flow rate of 0.3 µl min<sup>-1</sup>: 0-3 min 3% B (trap only); 3-4 min linear increase B to 7%; 4-103 min increase B to 50%; 103-108 min increase B to 65%; followed by a ramp to 99% B and re-equilibration to 3% B. Data acquisition condition on an Orbitrap Fusion™ Tribrid™ mass spectrometer in positive ion mode: MS1/OT: resolution 120 K, profile mode, mass range *m/z* 300-1800, AGC 4e<sup>5</sup>, fill time 50 ms; MS2/IT: data dependent analysis was performed using parallel CID/HCD fragmentation with the following parameters: top 20 in IT rapid, centroid mode, isolation window 1.6 Da, charge states 2-7, threshold 2.5e<sup>4</sup>, CE = 30, AGC target 1.0e<sup>4</sup>, maximum inject time was 35 m, dynamic exclusion 2 counts, 30 s exclusion, exclusion mass window ±7 ppm.

Recalibrated peak lists were generated with MaxQuant 1.5.8.3 (Tyanova, *et al.*, 2016) in label-free quantitation (LFQ) mode using the *L. reuteri* protein sequence database (UniProt, 20170418, 2191 entries) plus the MaxQuant contaminants database (245 entries). The quantitative LFQ results from MaxQuant with default parameters were used together with search results from an in-house Mascot Server 2.4.1 (Matrix Science, London, UK) on the same databases. For this search, a precursor tolerance of 6 ppm and a fragment tolerance of 0.6 Da were used. The enzyme was set to trypsin/P with a maximum of 2 allowed missed cleavages; oxidation (M), acetylation (protein N-term) and deamidation (N, Q) were set as variable modifications and carbamido-methylation (C) as fixed modification. The Mascot search results were imported into Scaffold 4 ([www.proteomsoftware.com](http://www.proteomsoftware.com)) using identification probabilities of 99% for proteins and 95% for peptides.

### **1.2. Proteomics for *B. producta***

For total intracellular protein from *B. producta* ATCC 27340, the supernatant was precipitated by adding cold trichloroacetic acid (final concentration of 20%) and then incubated for 1 h on ice. Afterwards, the precipitate was collected by centrifugation ( $15,000 \times g$ , 15 min at 4 °C). The pellet of proteins was washed three times with 500  $\mu$ l ice-cold 0.01 M HCl in 90% acetone and a residual amount of acetone was evaporated by incubating at RT. Precipitated proteins were suspended in 0.1 M Tris-HCl containing 8 M urea at pH 8.5. Reduction, alkylation and trypsin digestion were performed as described above for *L. reuteri* strains.

*B. producta* ATCC 27340 peptides were first cleaned-up using Oasis HLB 1 cc Vac cartridges (Waters) using the manufacturer's protocol. SWATH-MS analysis of each sample was performed on a quadrupole-TOF hybrid mass spectrometer (TripleTOF 6600, SCIEX) coupled to an Eksigent Nano LC-425 system. A SWATH-MS method was created with 93 precursor isolation windows, defined based on precursor  $m/z$  frequencies in DDA run using the SWATH Variable Window Calculator (SCIEX), with a minimum window of 5  $m/z$ . Analysis parameters were optimised before any sample was run. Curtain gas and nebulizer gas were maintained at 25 and 20 psi respectively. The ion spray voltage and temperature was set to 5.5 kV and 250 °C respectively. About 4  $\mu$ g peptides were loaded on a trap-column (ChromXP C18 CL 5  $\mu$ m 120 Å, Eksigent, SCIEX) and desalting was performed with a flow rate of 10  $\mu$ l per min for 10 min. Peptides were separated on a reverse-phase C18 analytical column (ChromXP C18, 3  $\mu$ m 120 Å, Eksigent, SCIEX) in a 57 min long buffer gradient with a flow rate of 5  $\mu$ l/min using water with 0.1% formic acid (buffer A) and acetonitrile with 0.1% formic acid (buffer B) as follows: 0-38 min 3% B; 3-38 min linear increase B to 25%; 38-43 min increase B to 32%; 43-45 min increase B to 80%; followed by a ramp to 90% B and re-equilibration to 3% B.

Samples were analysed in data-independent acquisition (DIA) mode, which was acquired using Analyst TF 1.7.1 Software (SCIEX). Accumulation time was set to 0.25 s for the MS scan (400–1250  $m/z$ ) and 0.025 s for the MS/MS scans (100–1500  $m/z$ ). Rolling collision energies were applied for each window based on the  $m/z$  range of each SWATH and a charge 2+ ion with a collision energy (CE) spread of 5. The total cycle time was 2.3 s. The SWATH-MS run files were analysed in Spectronaut™ 15.4 software (Biognosys) using directDIA™ library-free workflow. The Pulsar search engine was used for protein identification, enzyme cleavage rules were set to trypsin, carbamidomethylation was set as the fixed modification and protein N-terminal acetylation and oxidation (M) were set as variable modifications. Protein FASTA files for *B. producta* from UniProtKB (UP000464715, 5365 protein entries) was used and protein identification was performed with 0.05 FDR, while a mutated decoy method was used for FDR analysis. Direct DIA™ analysis was performed with default settings and quantitation was performed using area at MS2 level. Cross-run data normalisation was performed where the normalisation strategy was set to automatic. Quantitative data were exported in the form of 'Run Pivot Report' and differential protein analysis was performed in Microsoft Excel.

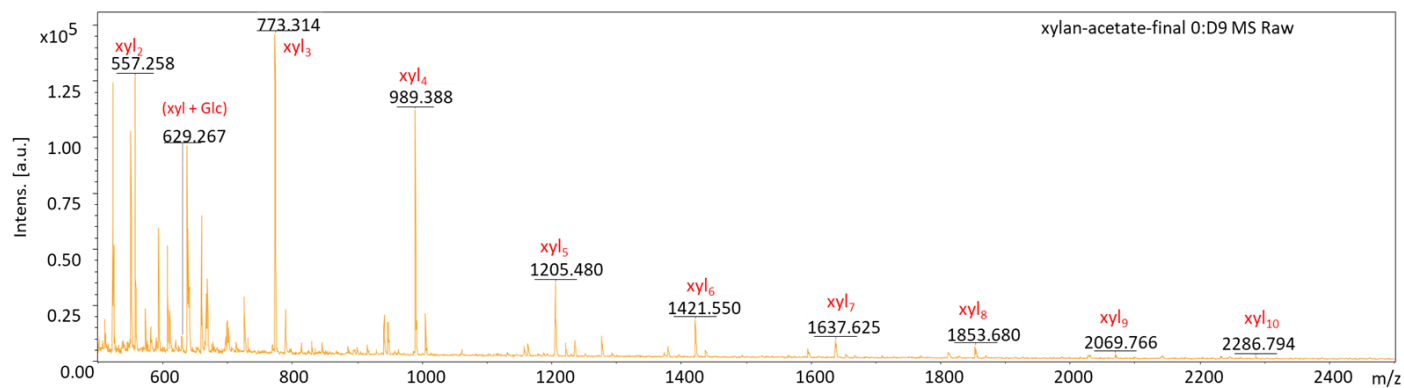

**B**

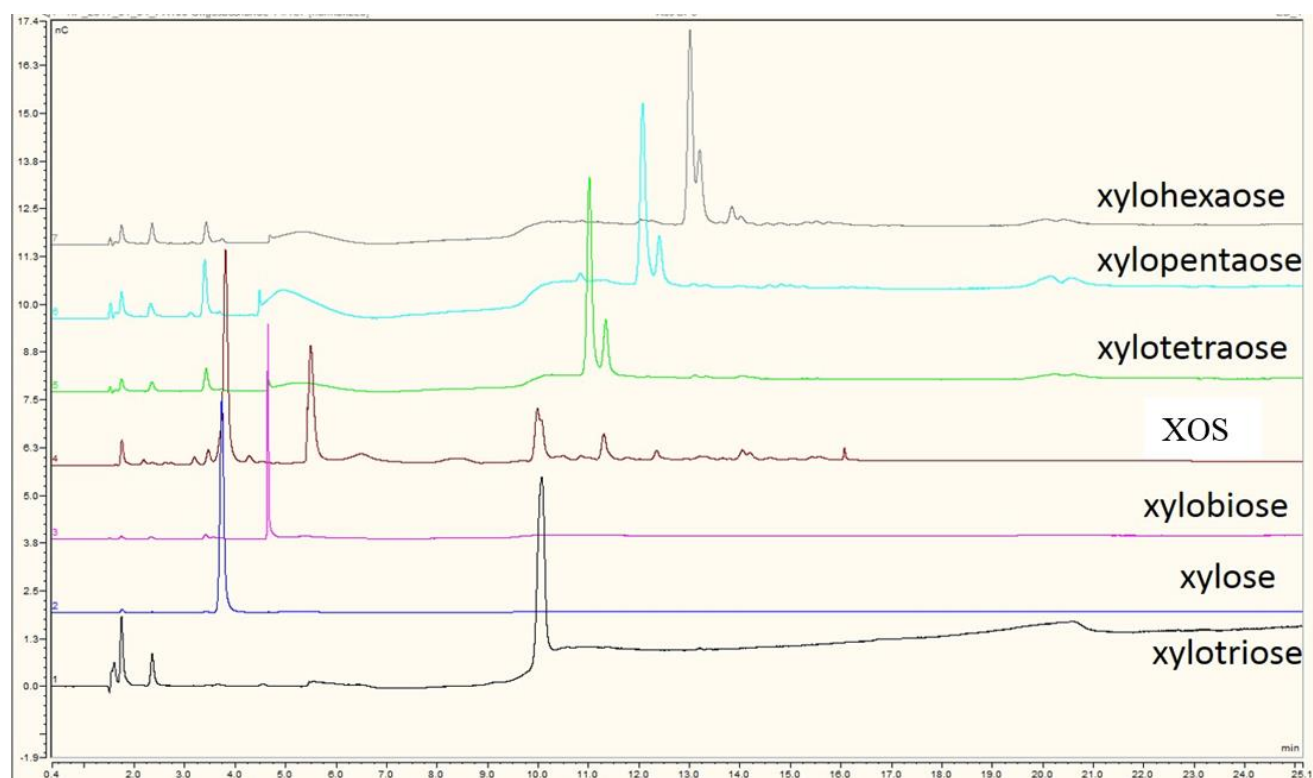

**Figure S1:** Chemical characterisation of XOS used in this study. MALDI-MS (A) and HPAEC-PAD (B).

**A**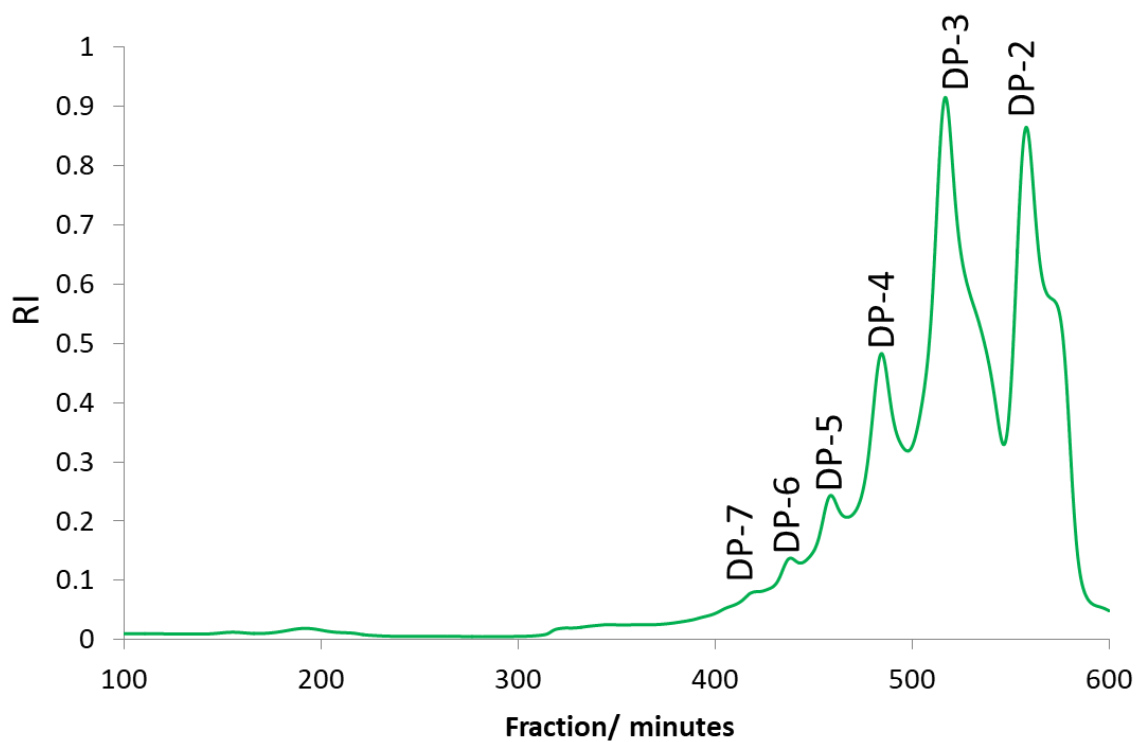**B**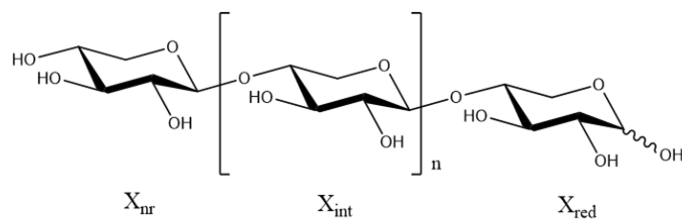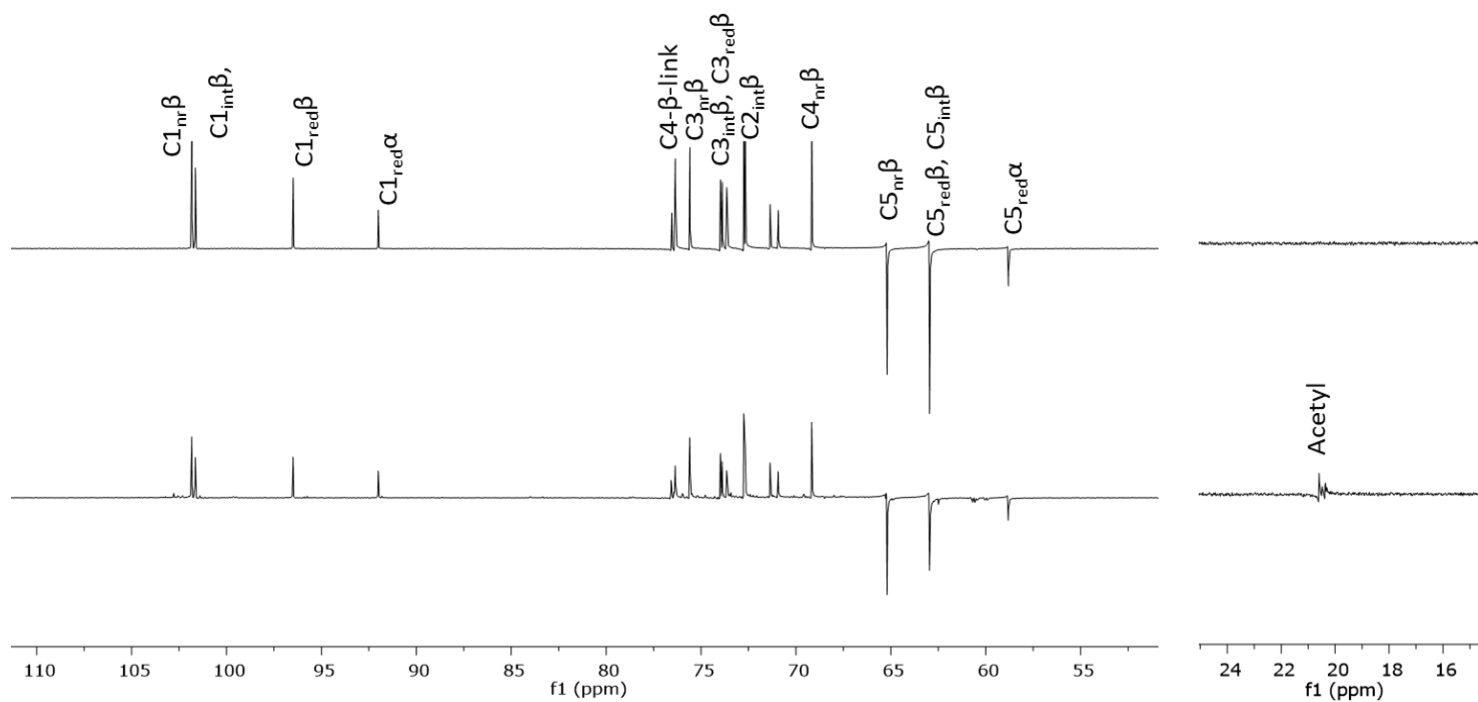

C

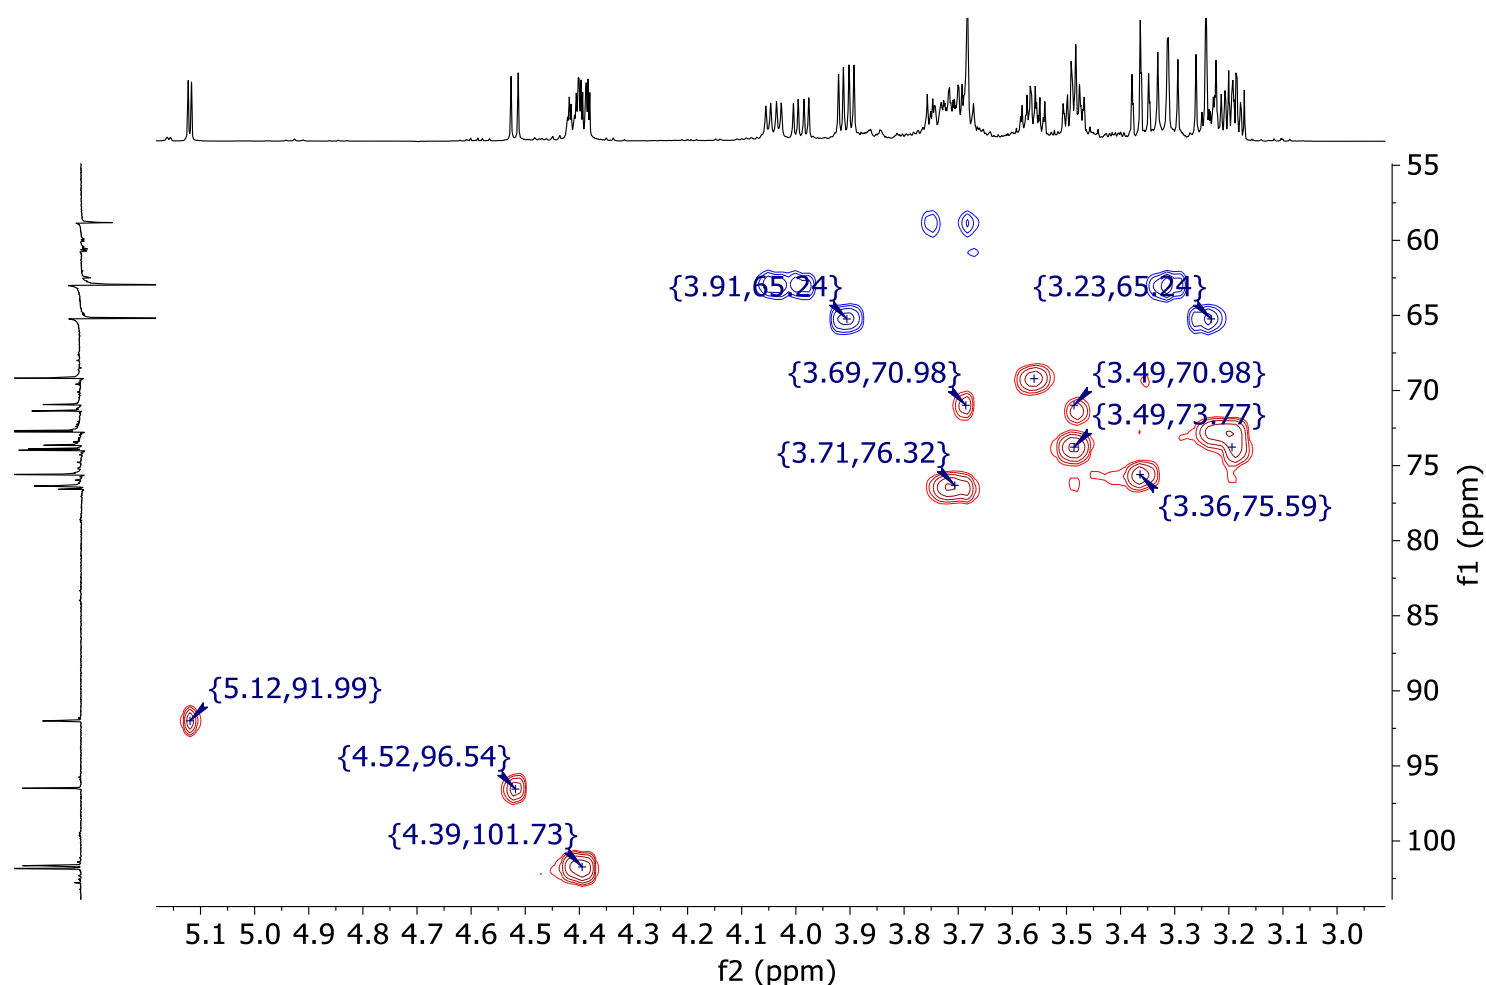

**Figure S2:** Chemical characterisation of XOS used in this study. (A) Gel permeation chromatography, (B) DEPT135-NMR of with and without acetate derivatives of XOS and (C) HSQC spectrum of XOS. DEPT135 of XOS with and without acetate derivatives clearly indicate that used XOS for bacterial growth was not substituted with acetyl group whose signal is present around 20.5 ppm. HSQC and DEPT135 identified reducing (red), non-reducing (nr) and internal (int) residues of XOS with all main signals located between 58.81 to 101.83 ppm. Anomeric region of XOS can be assigned at 101.83 ( $\text{C1}_{\text{nr}\beta}$ ), 101.64 ( $\text{C1}_{\text{int}\beta}$ ), 96.49 ( $\text{C1}_{\text{red}\beta}$ ) and 92.00 ( $\text{C1}_{\text{red}\alpha}$ ). The presence of signals for  $\text{C1}_{\text{red}\beta}$  and  $\text{C1}_{\text{red}\alpha}$  highlighted that the reducing end residue was unsubstituted and could freely be rotated in  $\alpha$  and  $\beta$  conformations. The signals corresponding to ( $\beta$ -1,4) xylosidic linked residues were observed at 76.42 ( $\text{C4}_{\text{red}\beta}$ ) and 76.36 ( $\text{C4}_{\text{int}\beta}$ ) whilst signal for  $\text{C4}_{\text{red}\beta}$  of non-reducing end residue was observed at 69.17 ppm. This analysis was in alignment with previously characterised XOS (Xiao, *et al.*, 2018).

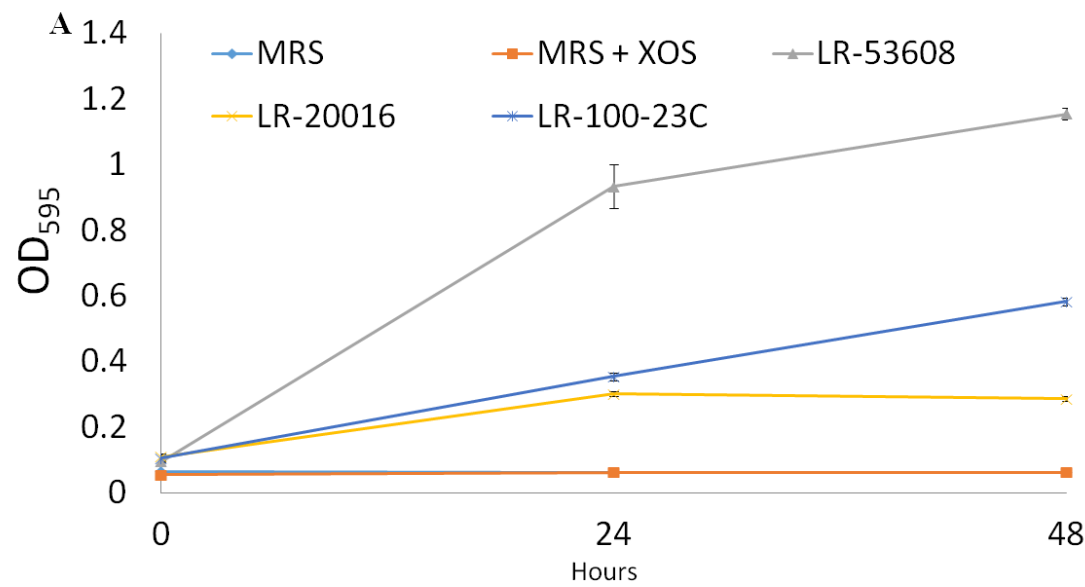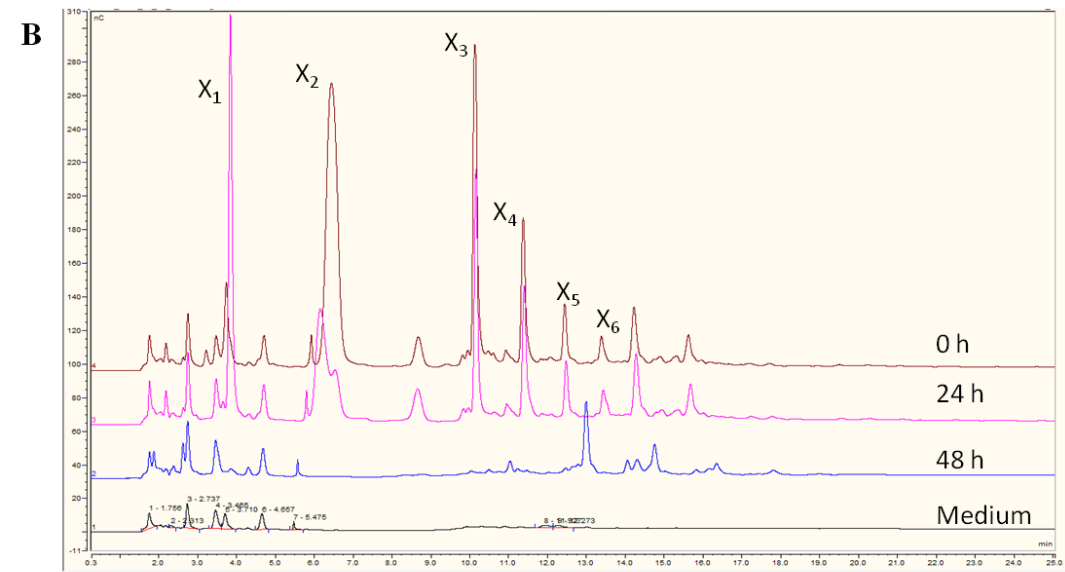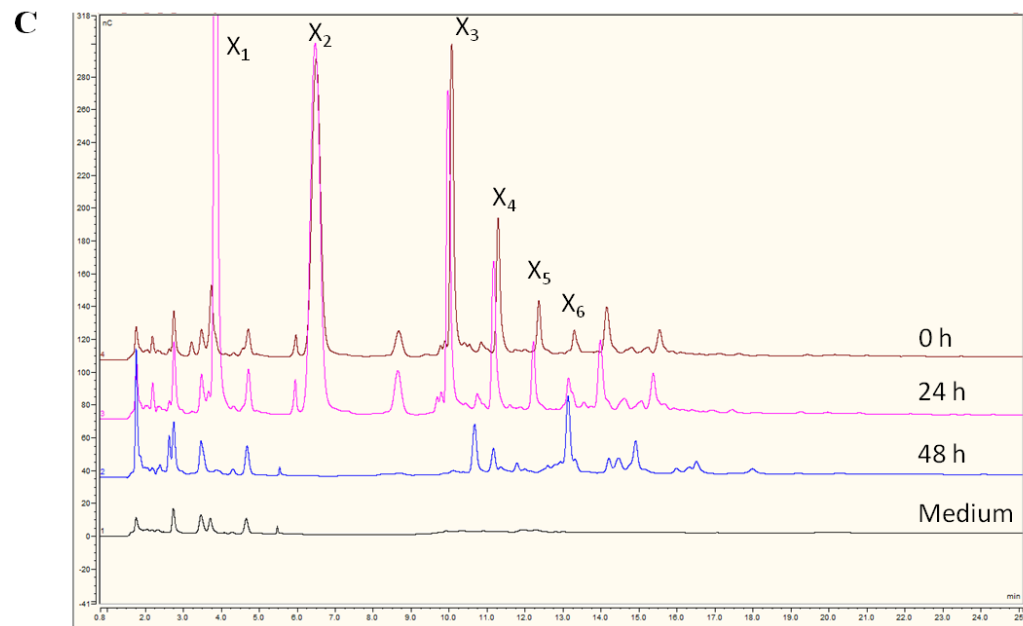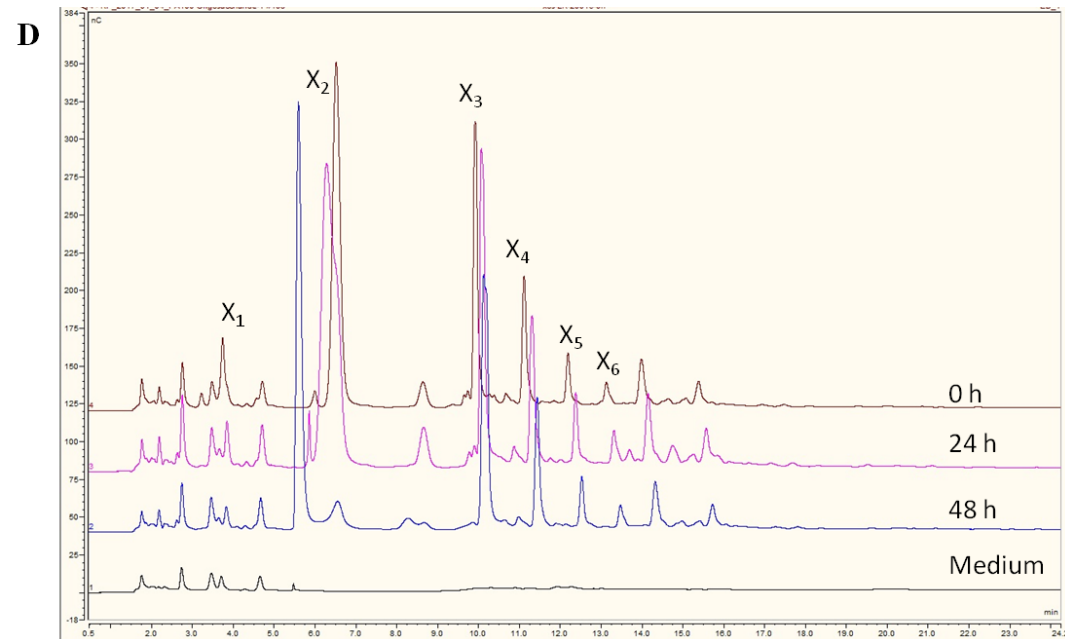

**Figure S3:** Analysis of *L. reuteri* XOS growth and utilisation. (A) Growth curves of *L. reuteri* strains cultured in modified MRS containing 1% XOS (MRS+ XOS). HPAEC analysis of XOS utilisation by *L. reuteri* ATCC 53608 (B), *L. reuteri* ATCC 100-23C (C) and *L. reuteri* ATCC 20016 (D). X<sub>1</sub>- xylose, X<sub>2</sub>- xylobiose, X<sub>3</sub>- xylotriose, X<sub>4</sub>- xyloetraose, X<sub>5</sub>- xylopentaose and X<sub>6</sub>- xylohexaose.

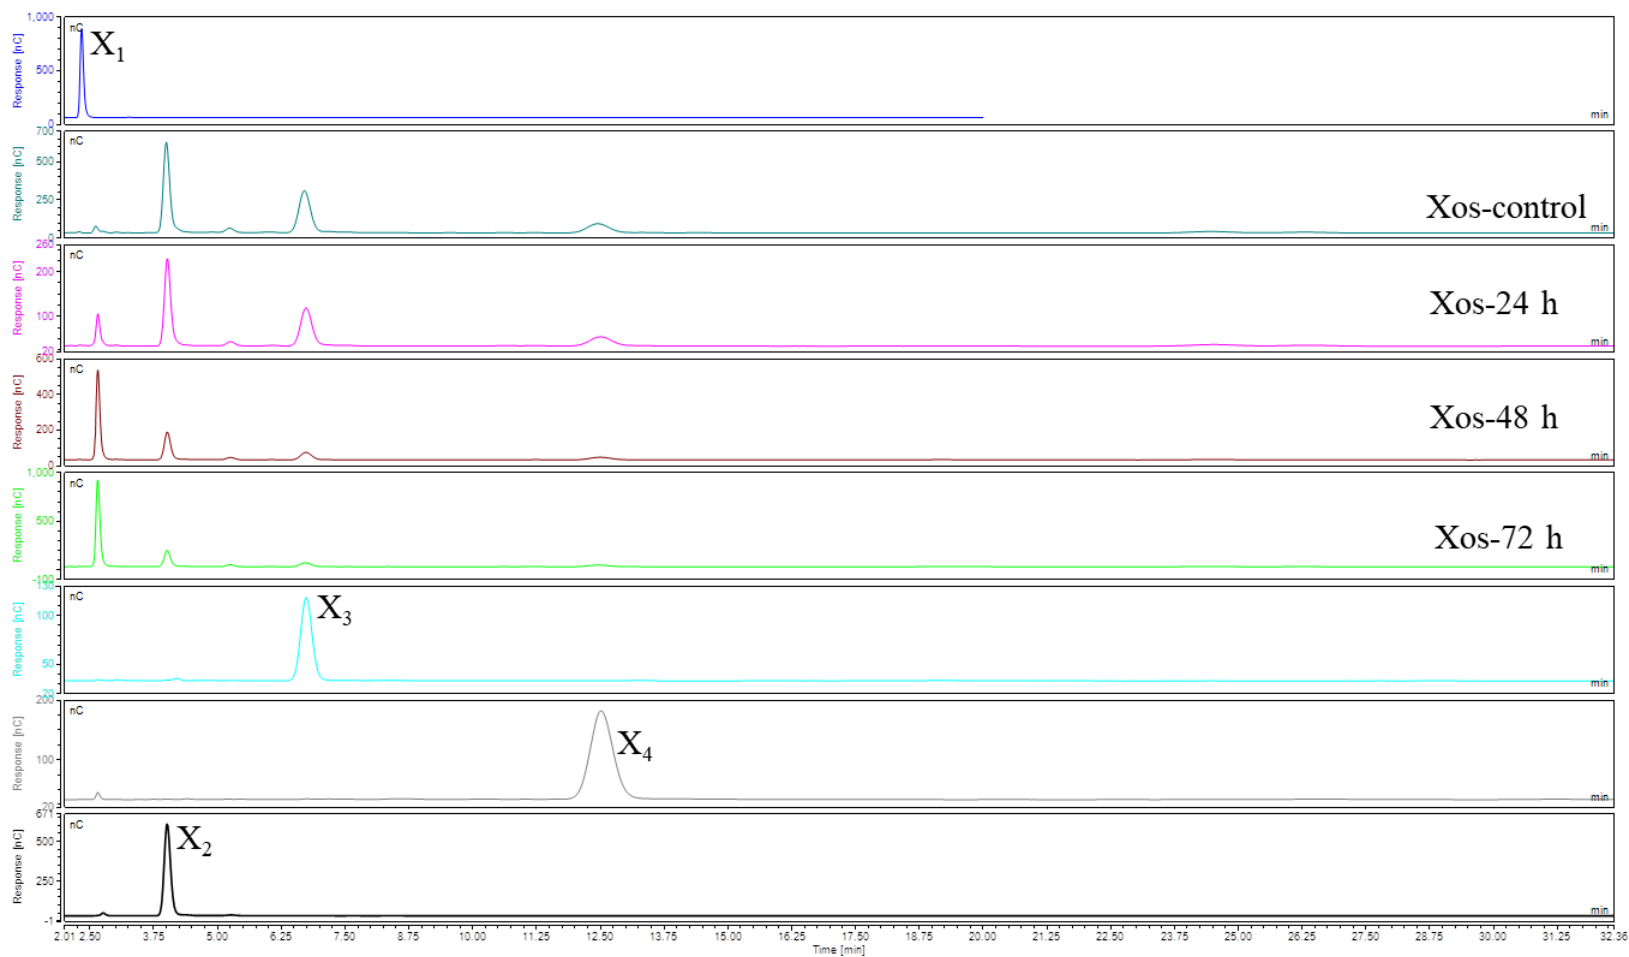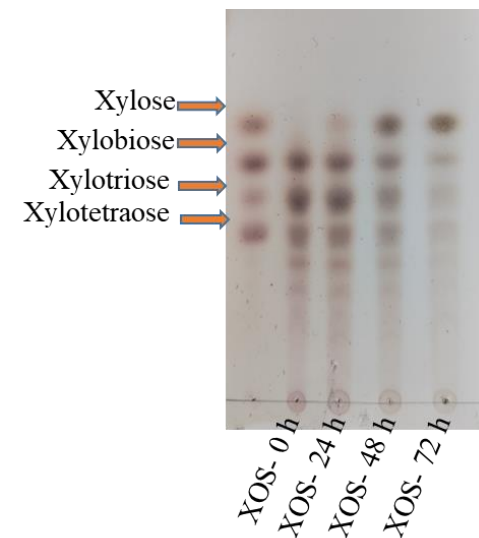

**Figure S4:** Analysis of XOS utilisation by *B. producta* ATCC 27340. HPAEC-ED (A) and thin layer chromatography (B) were used to monitor XOS degradation products over time. X<sub>1</sub>- xylose, X<sub>2</sub>- xylobiose, X<sub>3</sub>- xylotriose and X<sub>4</sub>- xylotetraose.



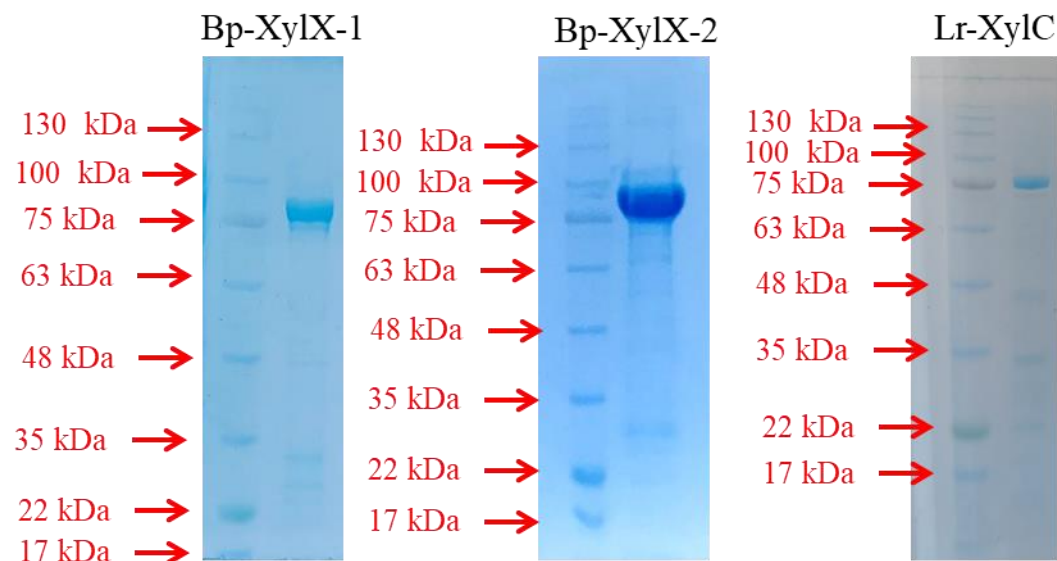

**Figure S5A.** Analysis of recombinant  $\beta$ -xylosidases on 10 % SDS-PAGE. Broad range (10-230 kDa) molecular weight marker was used. Apparent molecular weights are indicated with an arrow.

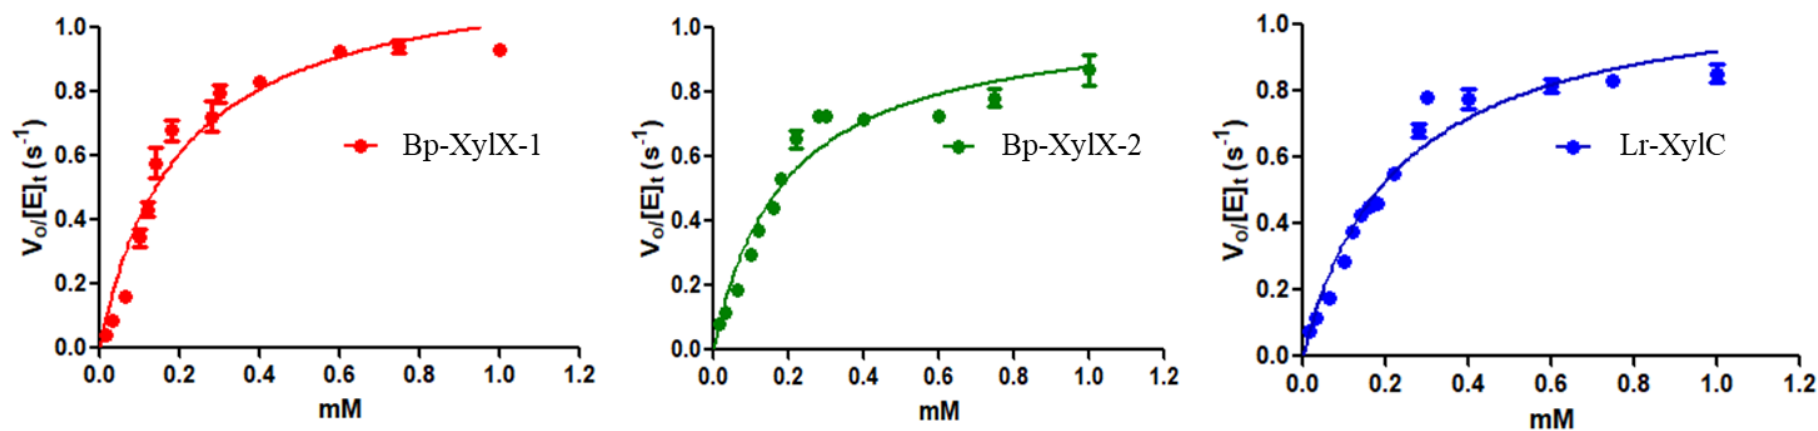

**Figure S5B.** Michaelis-Menten plots for Bp-XylX-1, Bp-XylX-2 and Lr-XylC using different concentrations of pNP-Xyl. All reactions were performed in triplicate. Data were plotted using GraphPad Prism (v 5.04).

**A**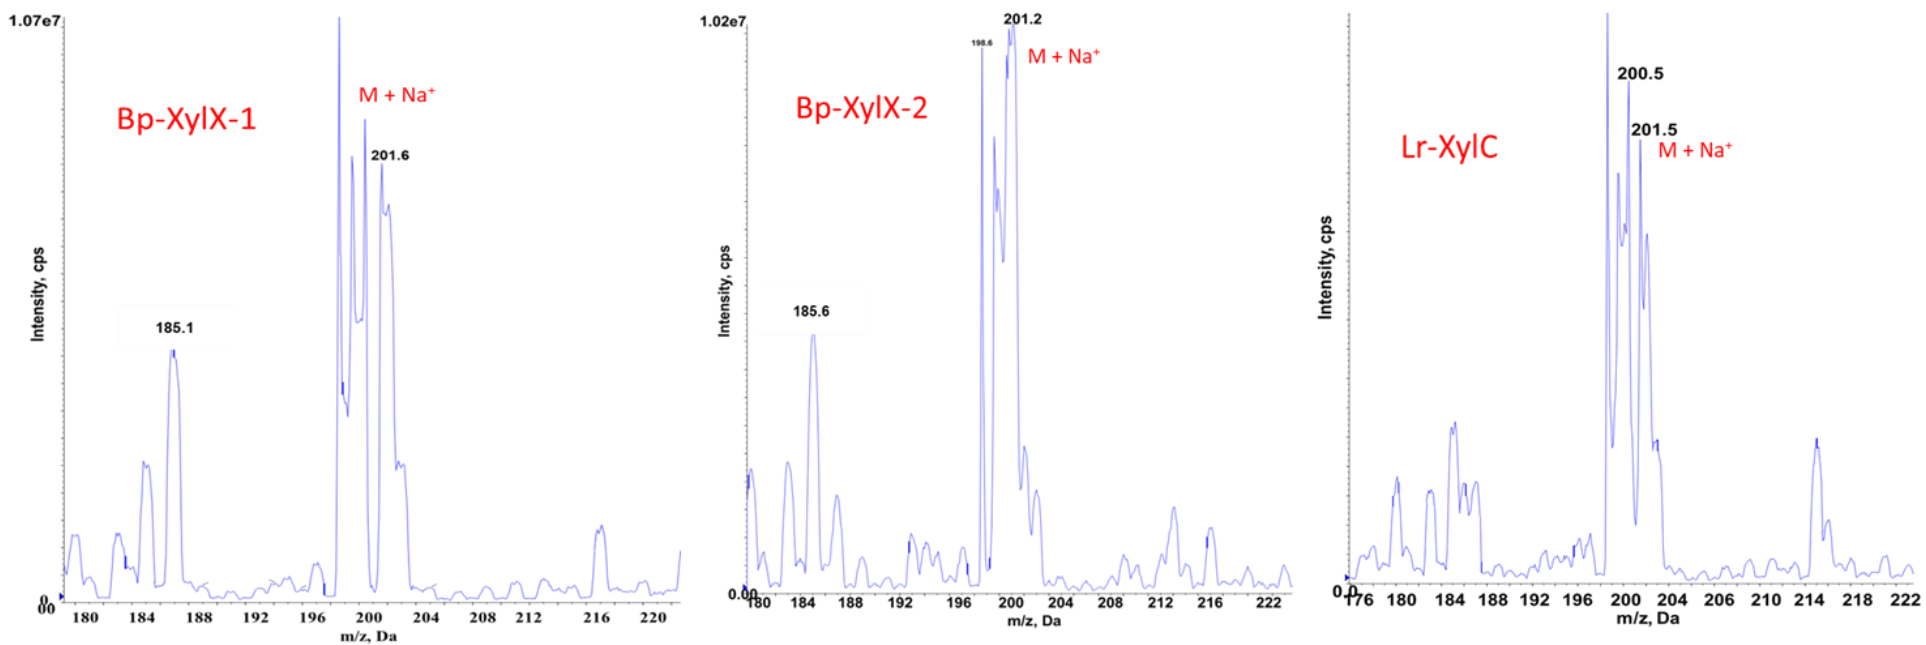**B**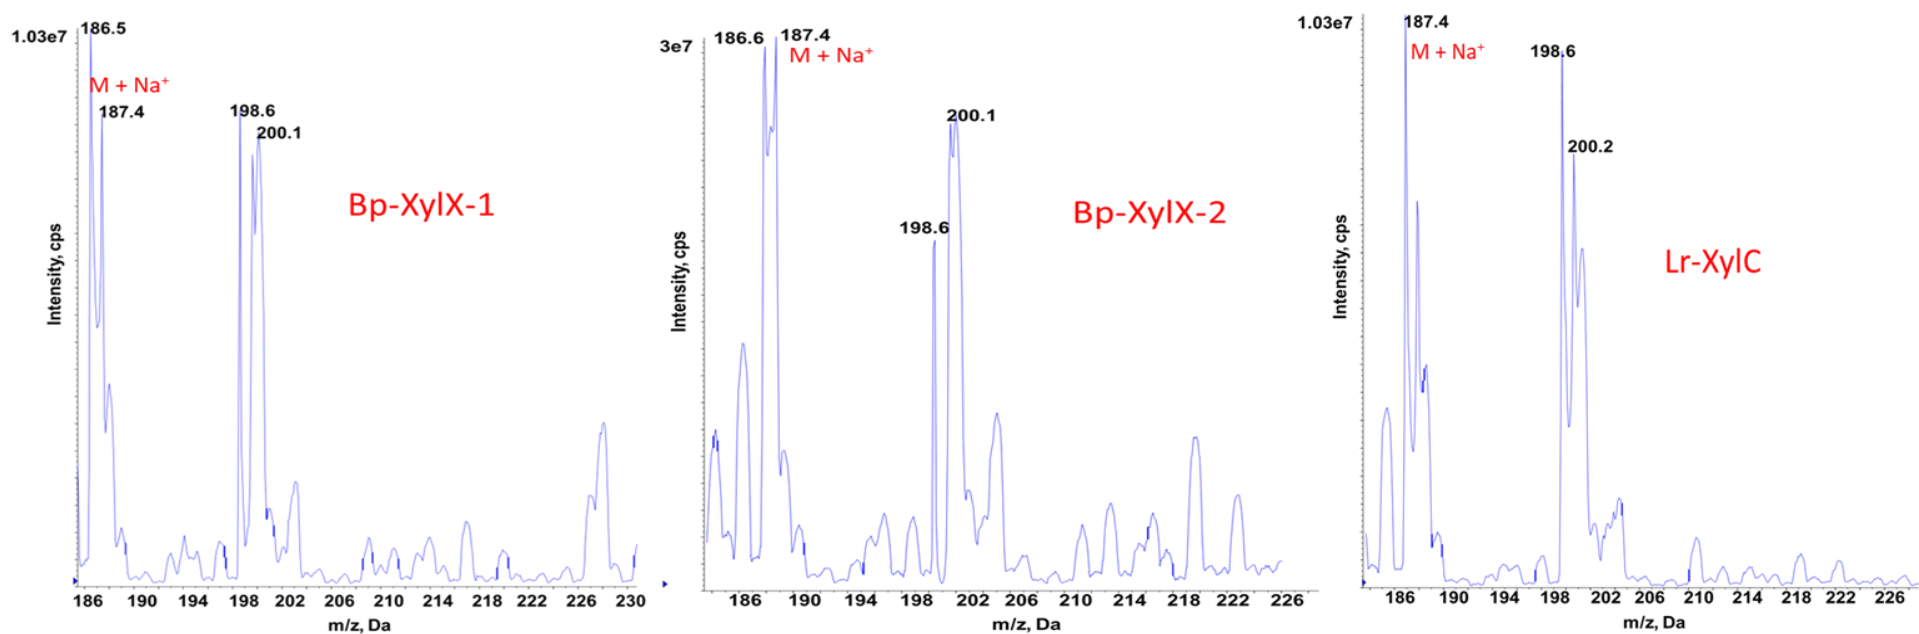

**Figure S6:** Transxylosylation activities of recombinant xylosidases. ESI-MS of ethoxylated (A) and methoxylated (B) xyloses catalysed by  $\beta$ -xylosidases (Bp-XylX-1, Bp-XylX-2 and Lr-XylC). *p*NP-Xyl was used as acceptor at 2 mM final concentration.

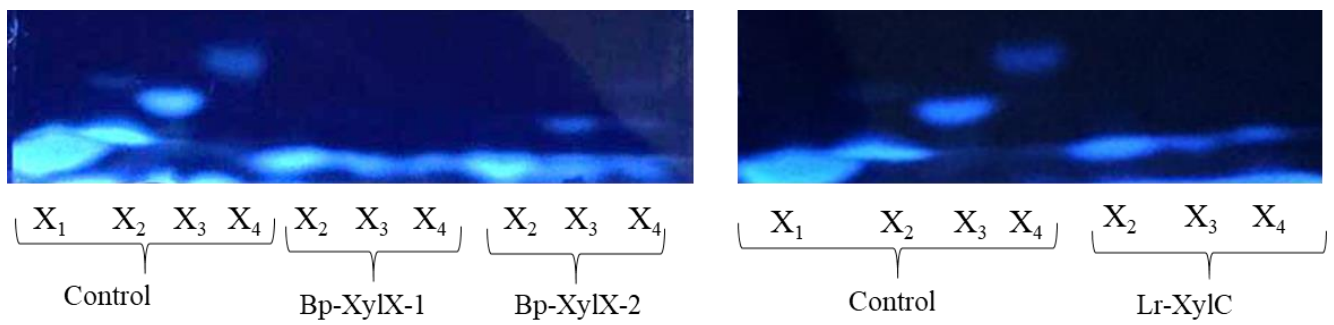

**Figure S7:** Enzymatic activity of recombinant  $\beta$ -xylosidases on xylobiose, xylotriose and xylotetraose. The products of the enzymatic reaction of Bp-XylX-1, Bp-XylX-2 and Lr-XylC on xylobiose, xylotriose and xylotetraose were analysed by FACE.

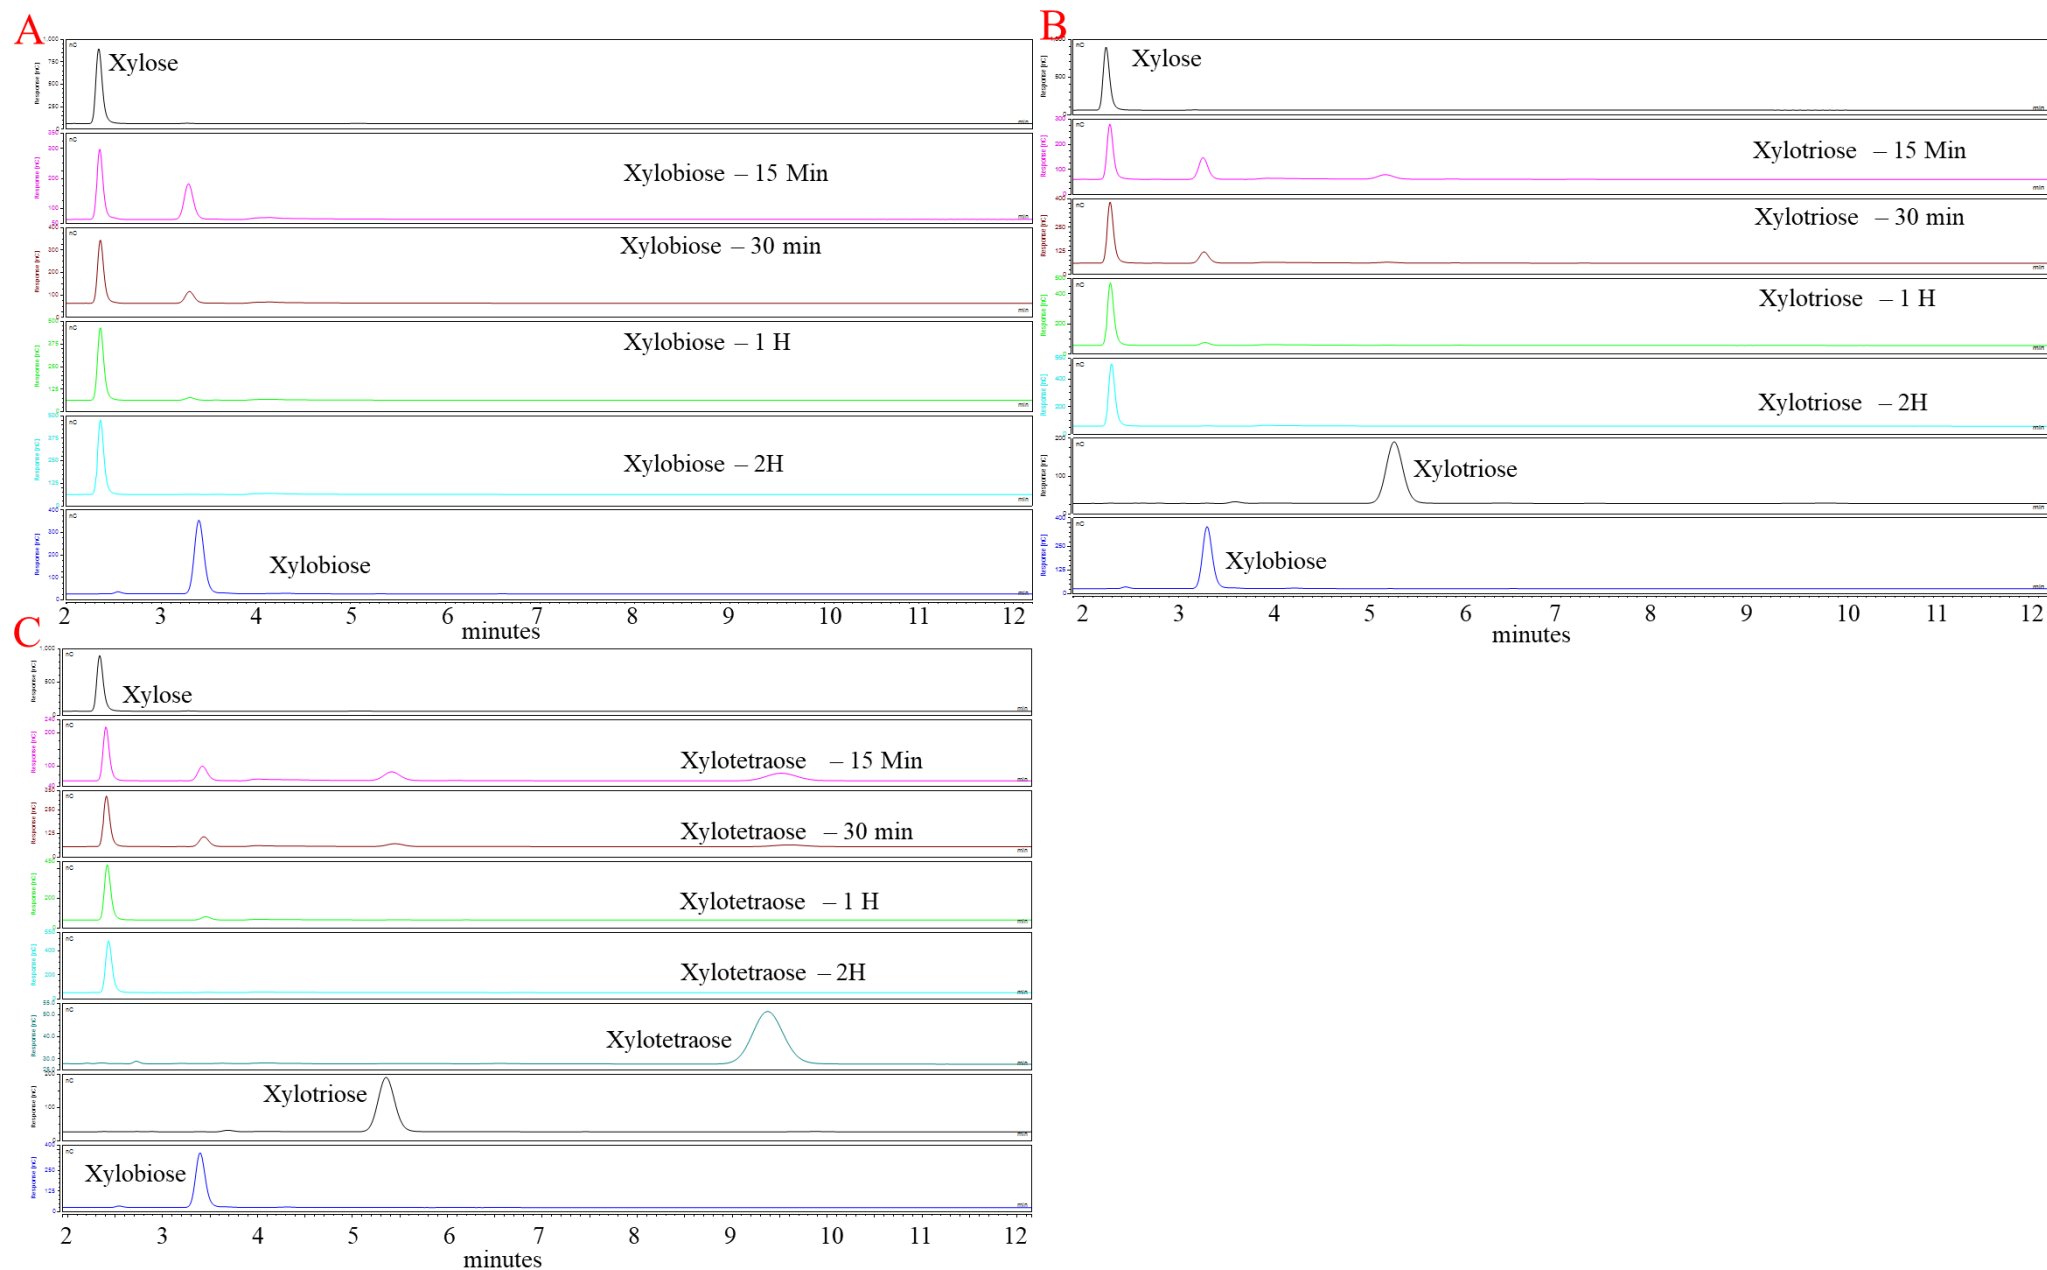

**Figure S8:** Digestion of xylobiose, xylotriose and xylotetraose by the Bp-XylX-1 from *B. producta* ATCC 27340. Digestion of xylobiose (A), xylotriose (B) and xylotetraose (C) was analysed by HPAEC-ED. Isocratic gradient of 200 mM NaOH was used.

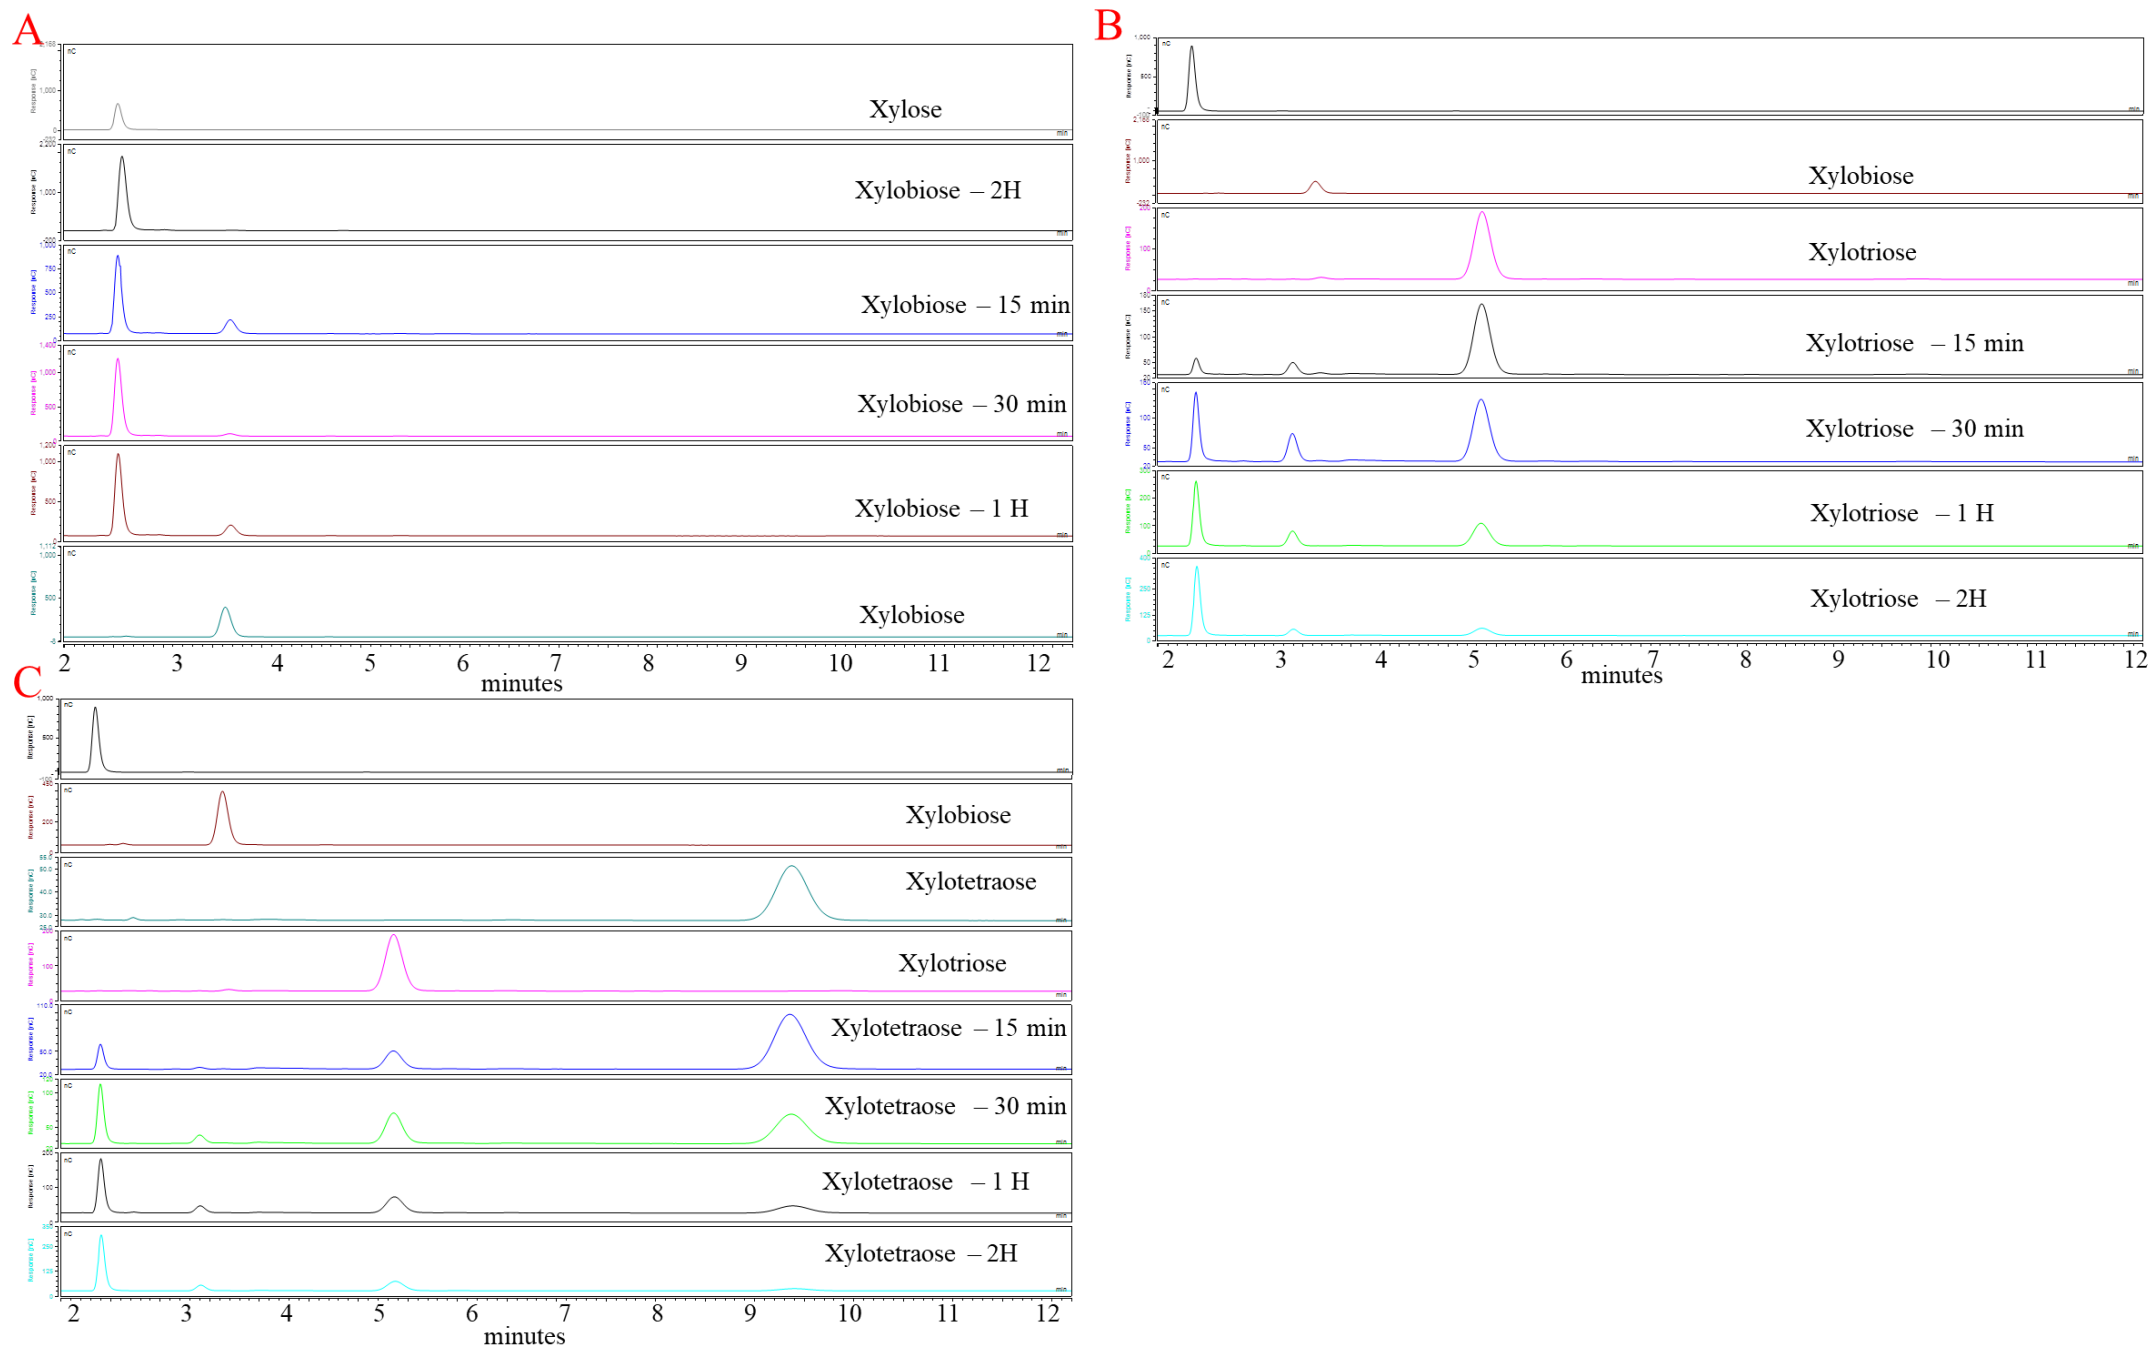

**Figure S9:** Digestion of xylobiose, xylotriose and xylotetraose by the Bp-XylX-2 from *B. producta* ATCC 27340. Digestion of xylobiose (A), xylotriose (B) and xylotetraose (C) was analysed by HPAEC-ED. Isocratic gradient of 200 mM NaOH was used.

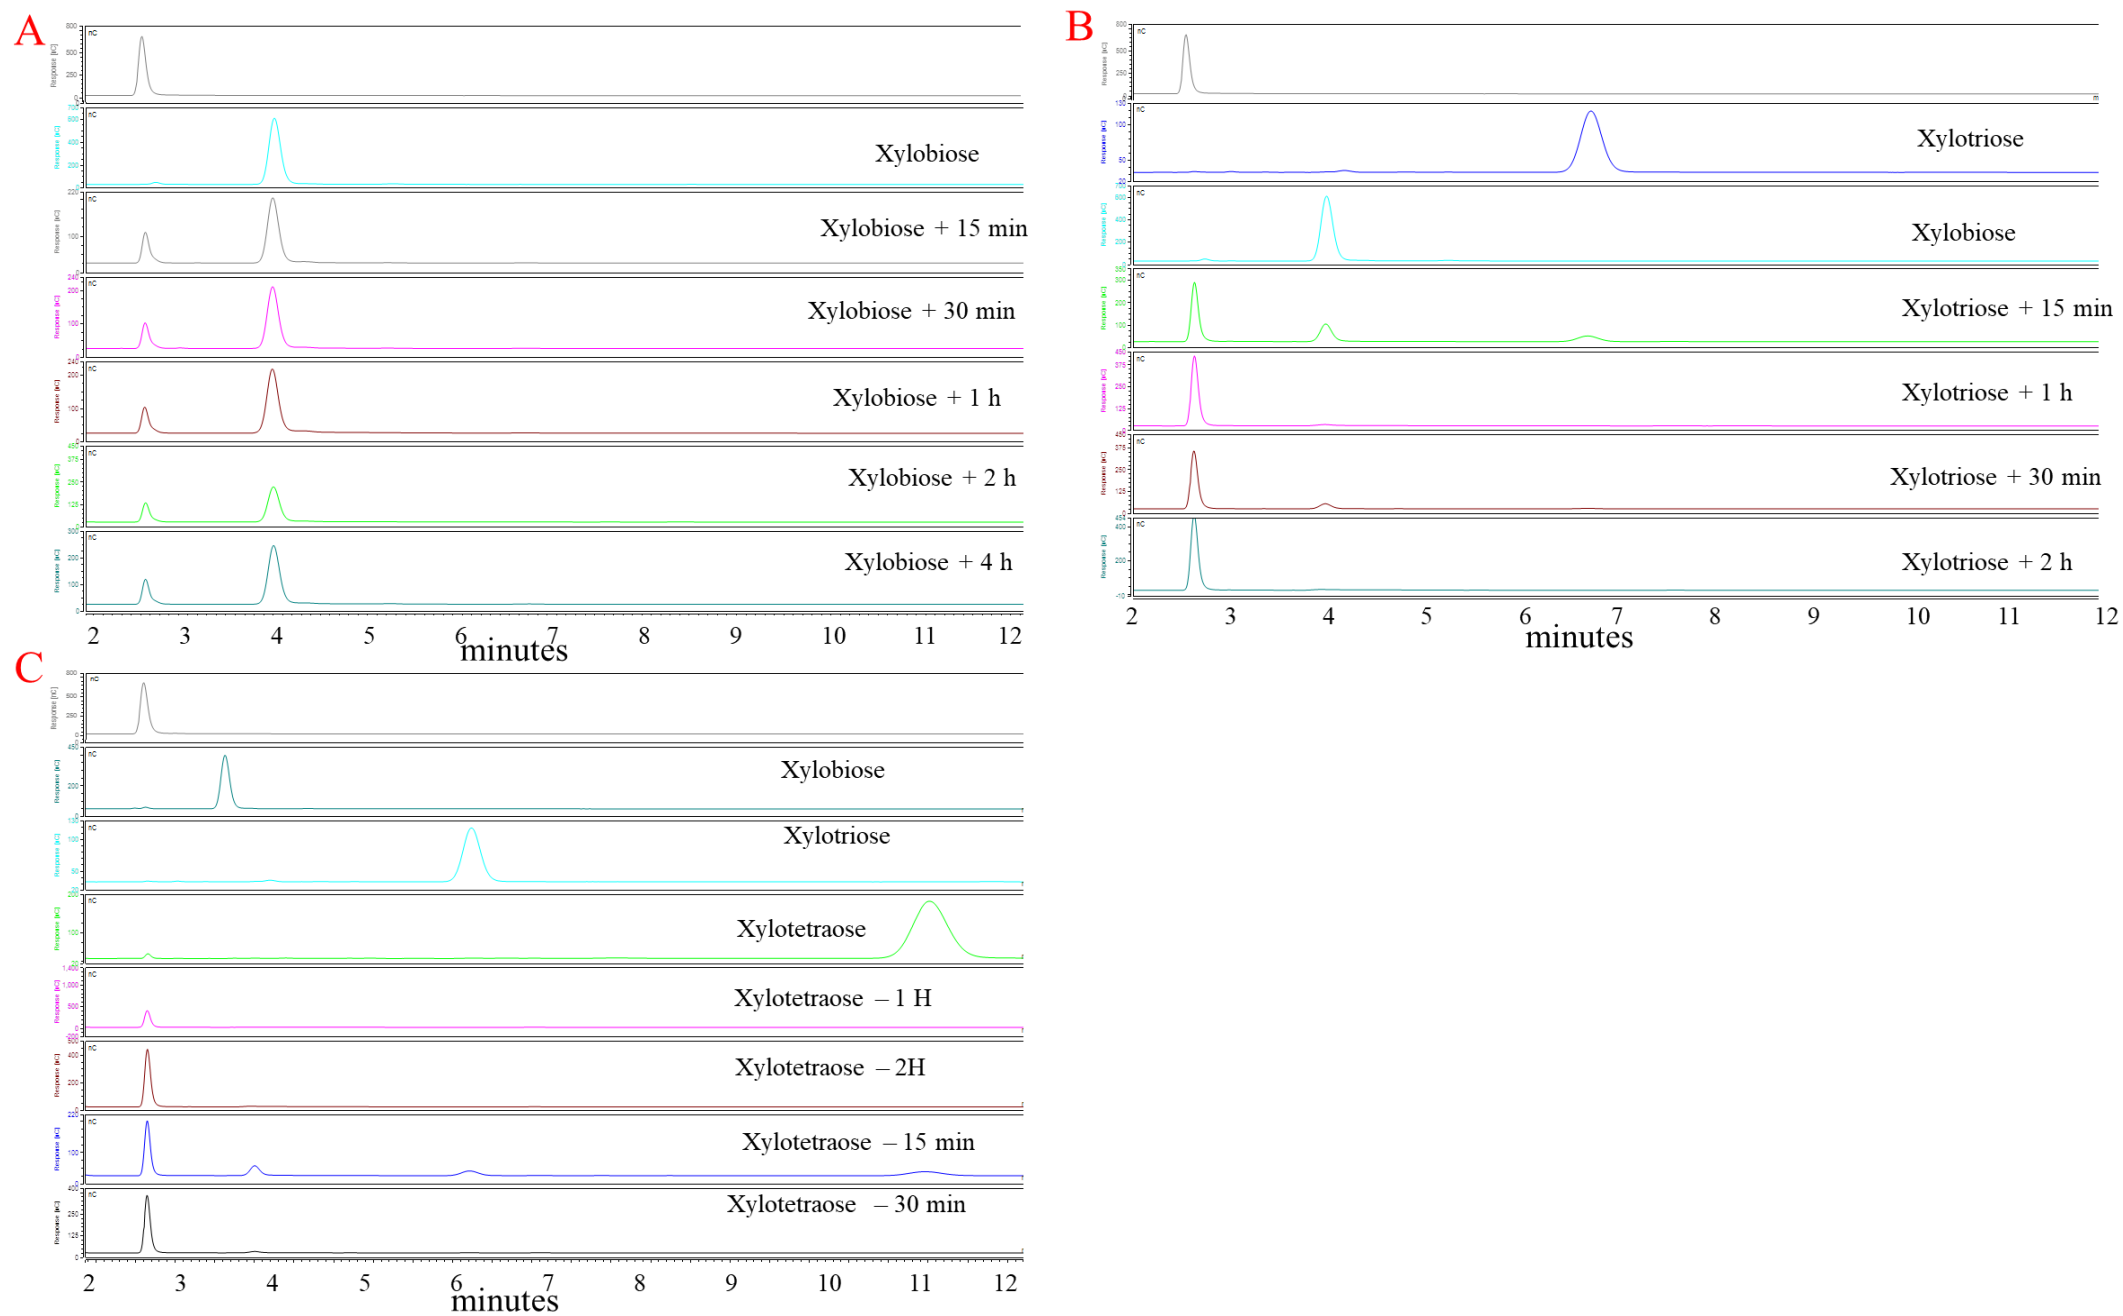

**Figure S10:** Digestion of xylobiose, xylotriose and xylotetraose by the Lr-XylC from *L. reuteri* ATCC53608. Digestion of xylobiose (A), xylotriose (B) and xylotetraose (C) was analysed by HPAEC-ED. Isocratic gradient of 150 mM NaOH.

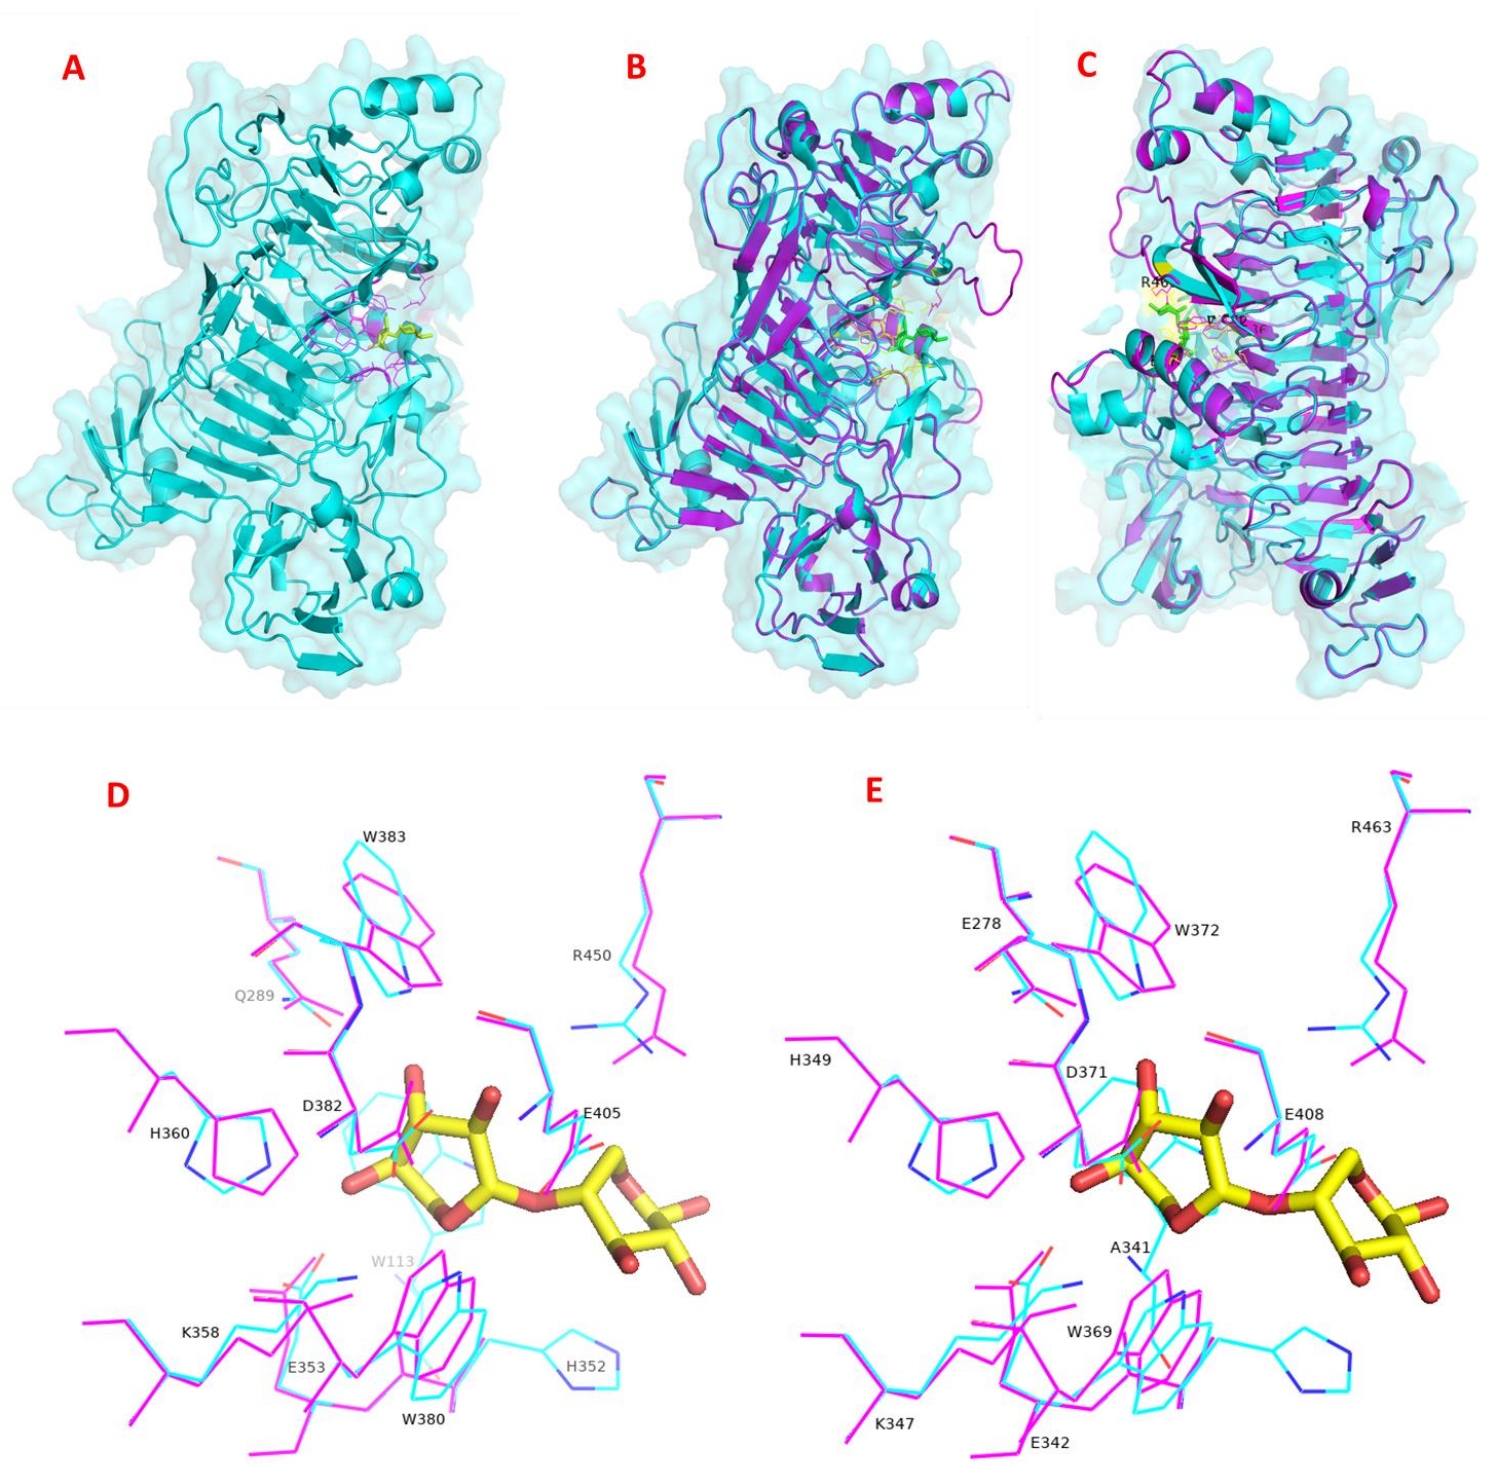

**Figure S11:** Homology modelling of Bp-XylX-1. Crystal structure (PDB ID: 3VSU) of Ts-XOS and it is represented in the transparent surface and cartoon representations (A). The Bp-XylX-1 (magenta) superimposed on Ts-XOS and showed in (B) rear view and (C) front view. Critical amino acid (AA) residues present in vicinity of xylobiose of Ts-XOS (cyan) and Bp-XylX-1 (magenta) at 5 Å (D and E). Labelled AA residues of Ts-XOS (D) and Bp-XylX-1 (E).



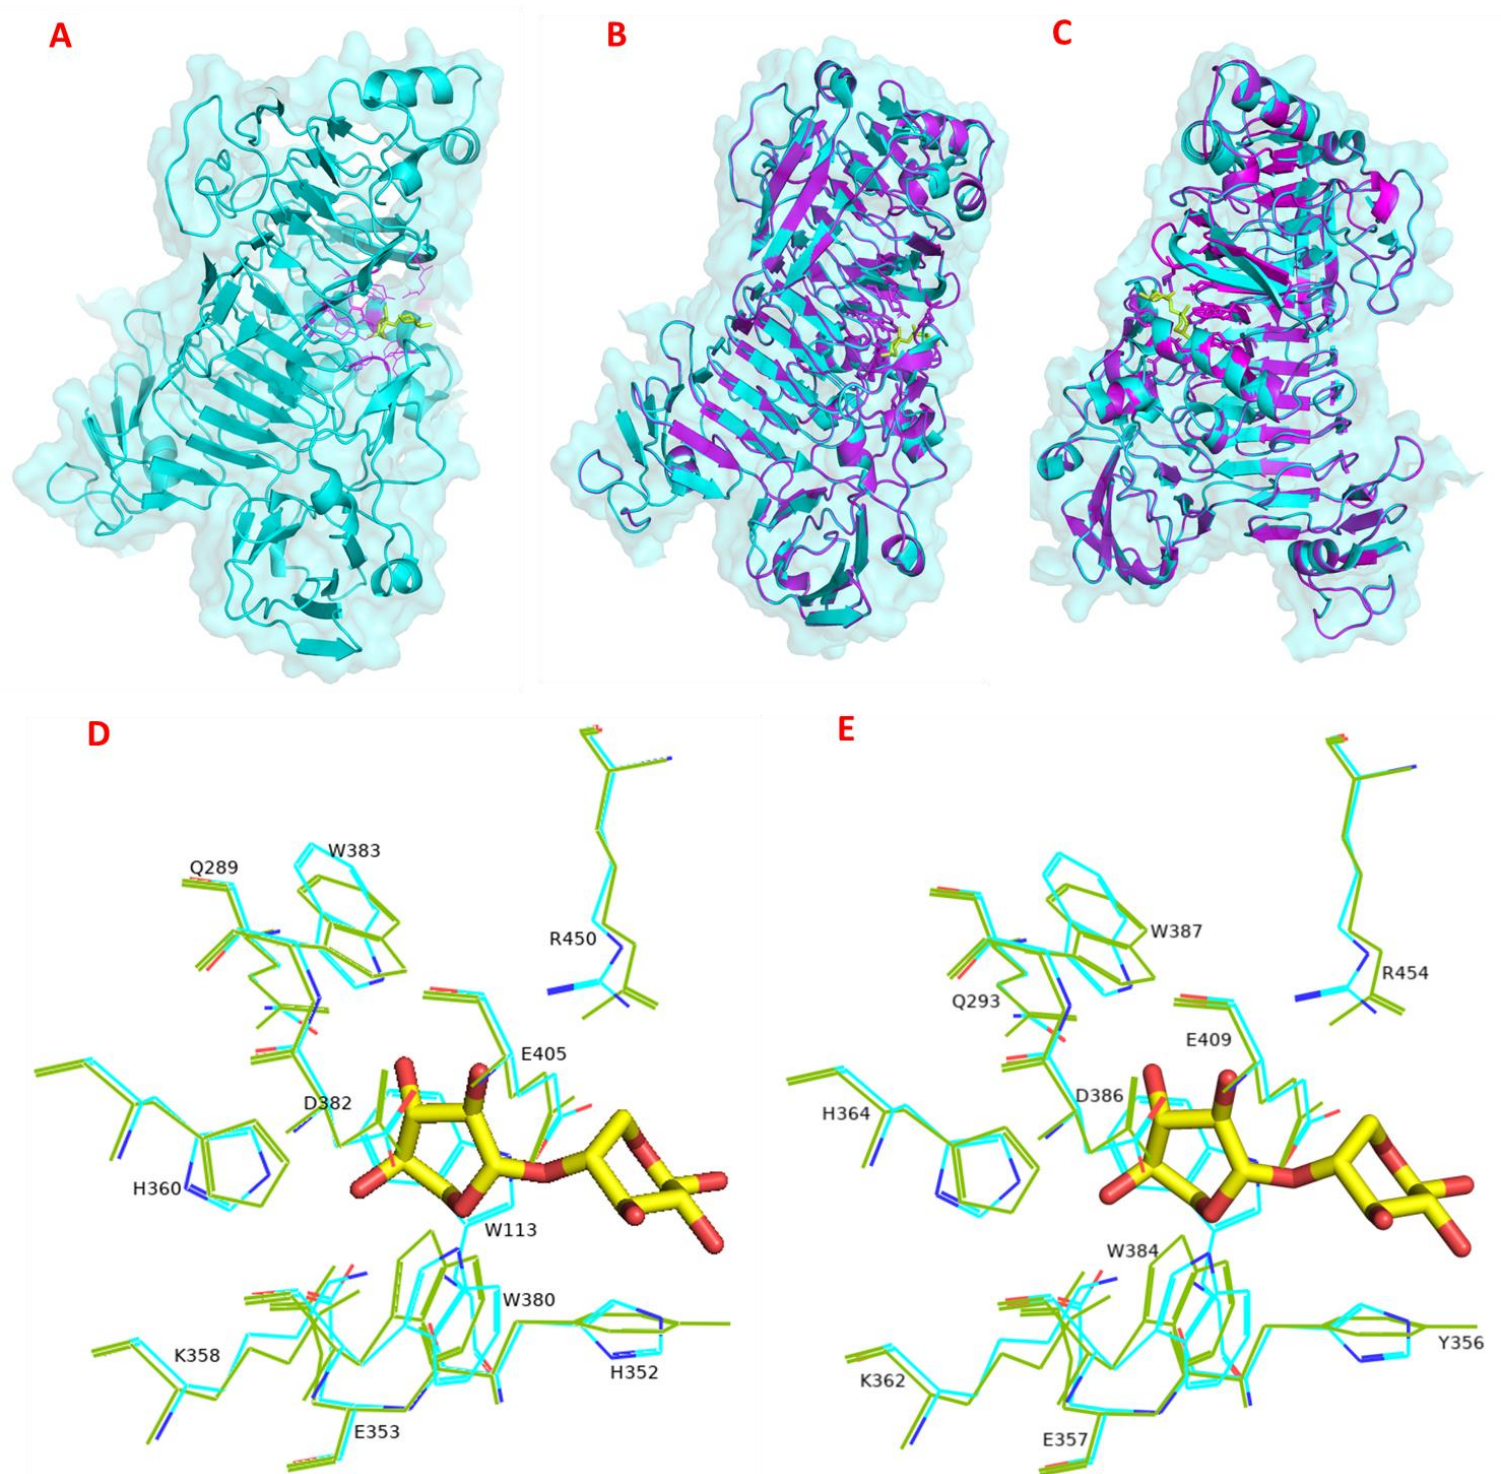

**Figure S12:** Homology modelling of Bp-XylX-2. Crystal structure (PDB ID: 3VSU) of Ts-XOS and it is represented in the transparent surface and cartoon representations (A). The Bp-XylX-2 (magenta) superimposed on Ts-XOS and showed in (B) rear view and (C) front view. Critical amino acid (AA) residues present in vicinity of xylobiose of Ts-XOS (cyan) and Bp-XylX-2 (green) at 5 Å (D and E). Labelled AA residues of Ts-XOS (D) and Bp-XylX-2 (E).



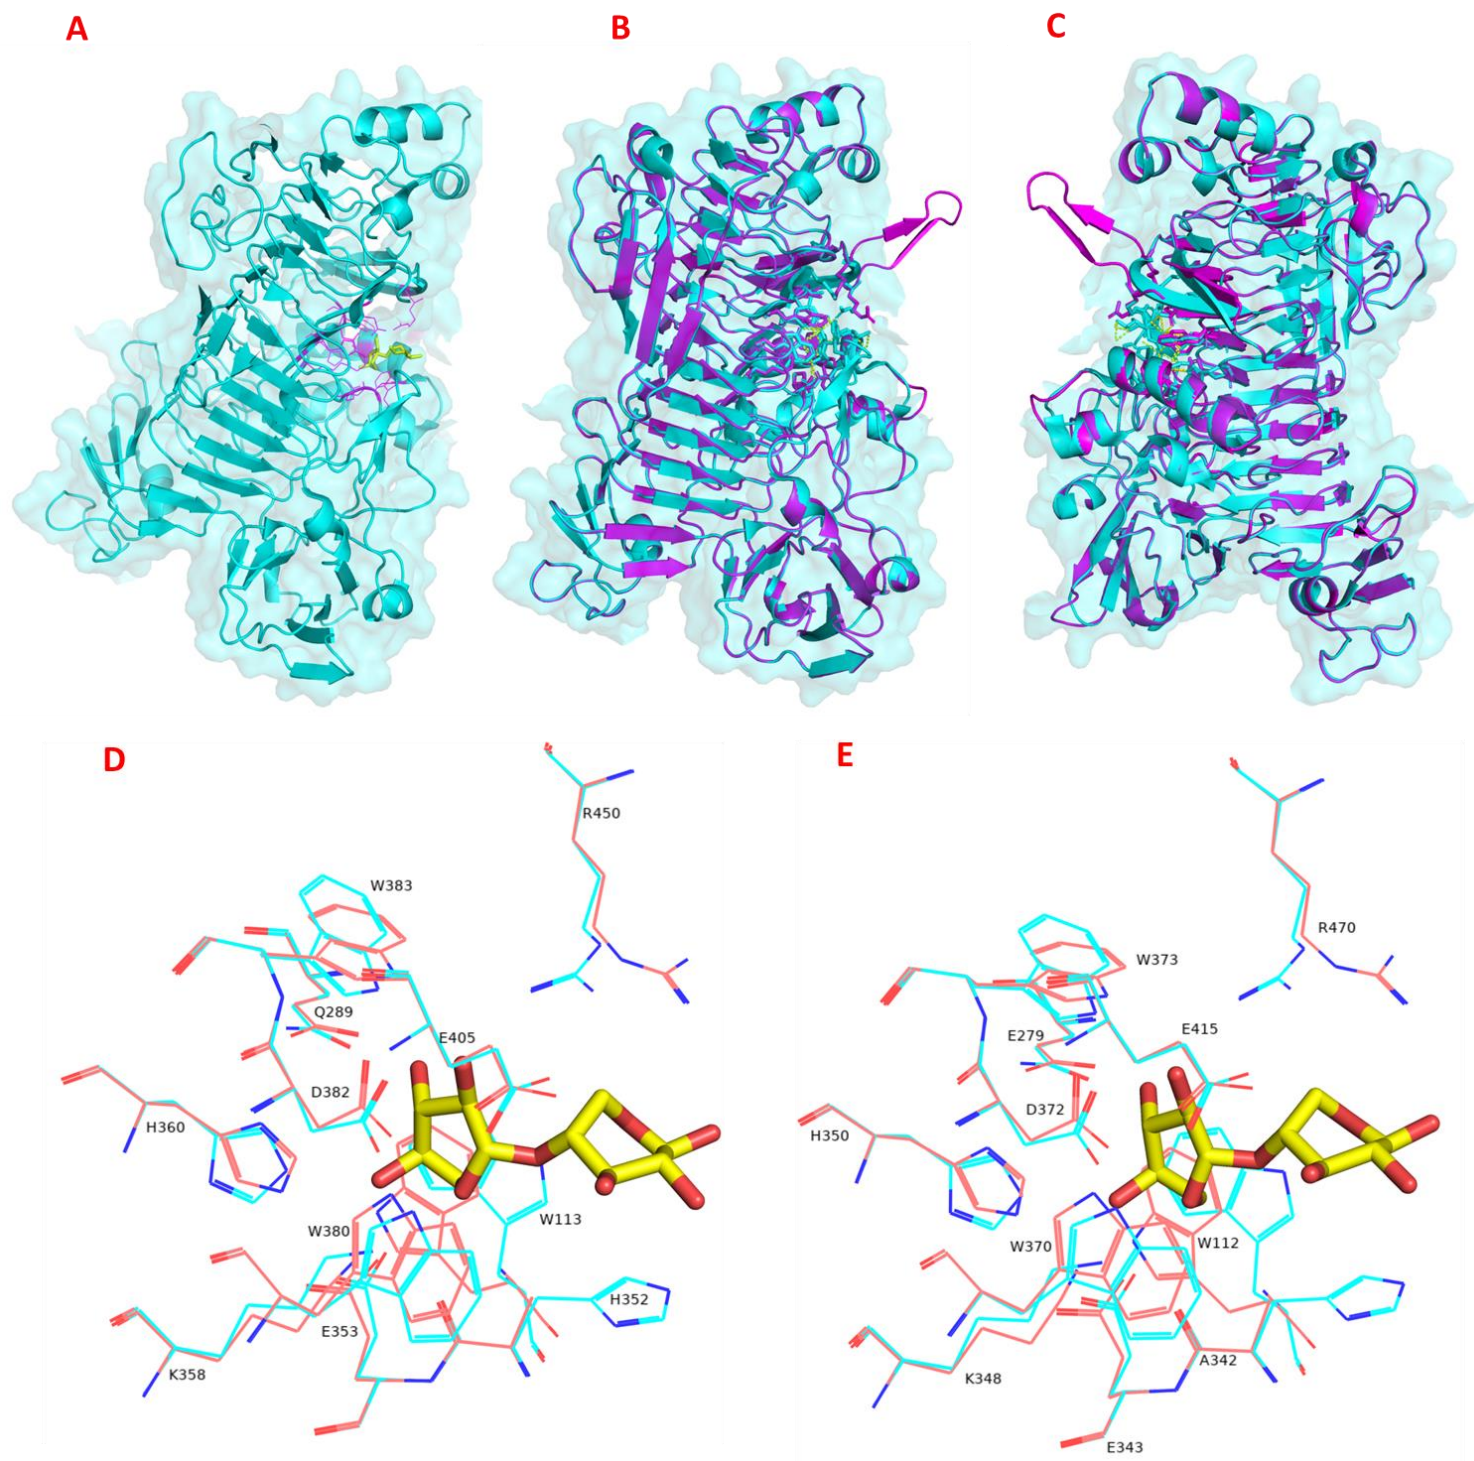

**Figure S13:** Homology modelling of Lr-XylC. Crystal structure (PDB ID: 3VSU) of Ts-XOS and it is represented in the transparent surface and cartoon representations (A). The Lr- XylC (magenta) superimposed on Ts-XOS and showed in (B) rear view and (C) front view. Critical amino acid (AA) residues present in vicinity of xylobiose of Ts-XOS (cyan) and Lr-XylC (red) at 5 Å (D and E). Labelled AA residues of Ts-XOS (D) and Lr-XylC (E).

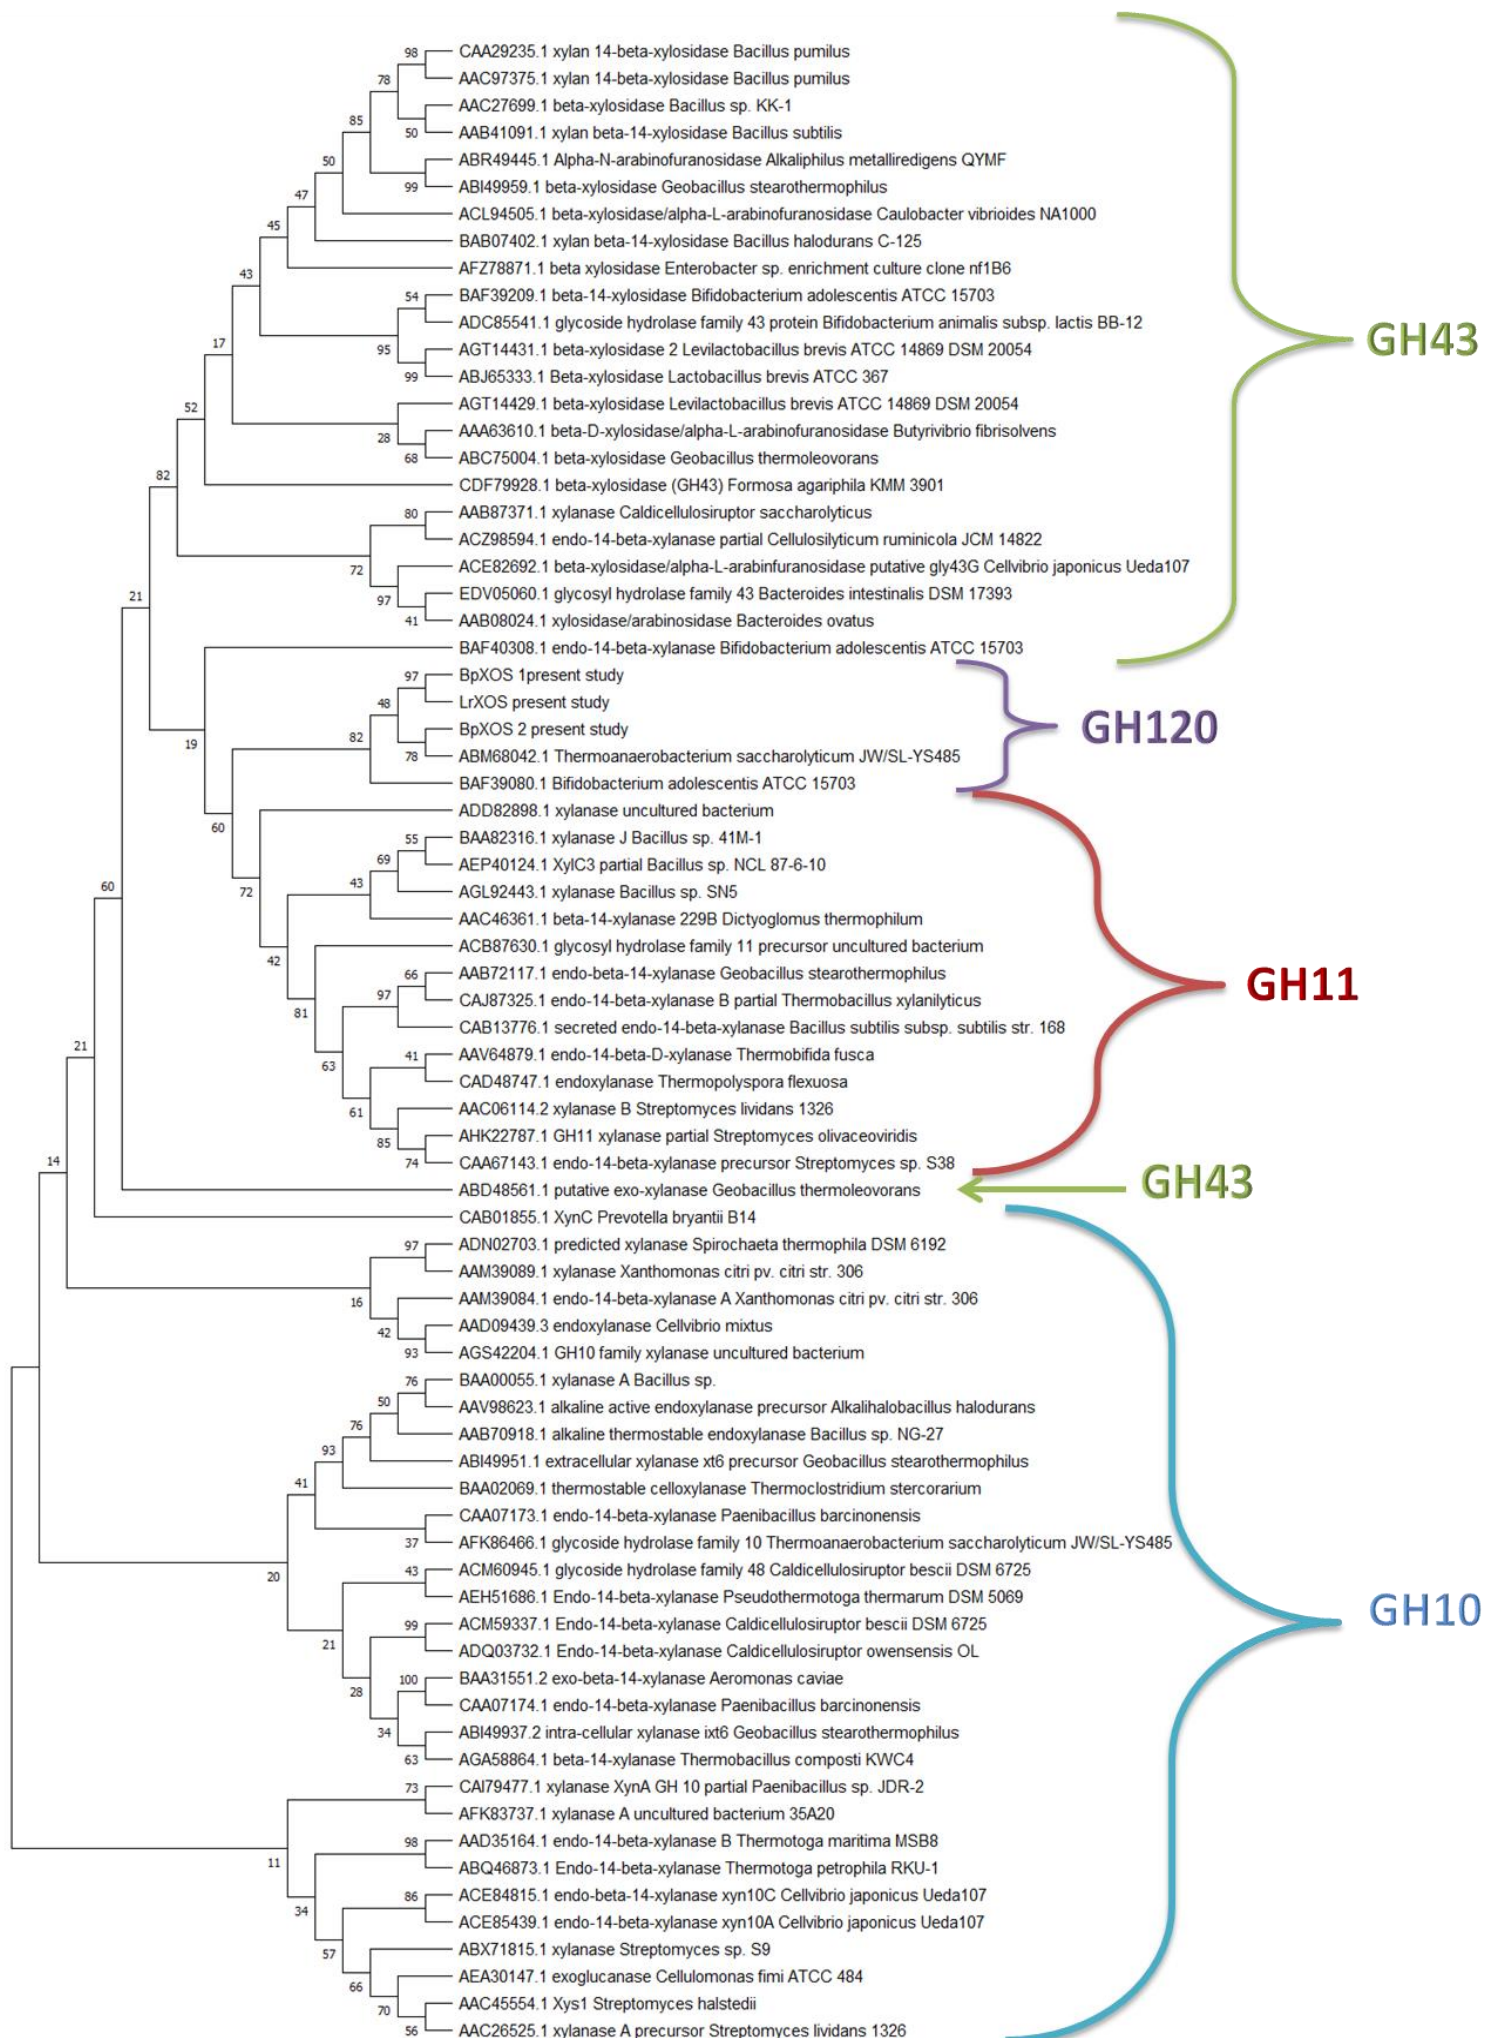



**Figure S14:** Evolutionary analysis by Maximum Likelihood method. The evolutionary history of different enzymes belonging to glycoside hydrolase family 10, 11, 43 and 120 were conducted with the maximum likelihood method and Jones-Taylor-Thornton matrix-based model (Jones, *et al.*, 1992). The evolutionary history of the taxa is represented with the bootstrap value which is inferred from 500 replicates (Felsenstein, 1985). The value of bootstrap test is shown next to branches (Felsenstein, 1985). Evolutionary analyses were conducted in MEGA-x (Kumar, *et al.*, 2018).

**Table: S1-**A list of primer used for cloning of genes in this study

| Name of primer       | Sequence                                  |
|----------------------|-------------------------------------------|
| Bp- XylX -1-F        | ACGCC <u>CATATG</u> ATGATTTATTATGTAGCCGCA |
| Bp- XylX -1-R        | TTAGCTCGAGTTATAATACGTTCCCGGATT            |
| Bp- XylX -2-F        | TGTAGCTAGC <u>ATGA</u> ACAGAGAATACCATGT   |
| Bp- XylX -2-R        | TTTACTCGAGTTATCCCCAGACTTTTATTT            |
| LR- XylC -F          | AACAGC <u>CATATG</u> ATGAATATTTATGTAGACAA |
| LR- XylC -R          | GTTCAC <u>TCGAGT</u> TAAAATAGTCTACTACTTG  |
| Bp- XylX <i>t</i> -F | AAAGGCTAGC <u>ATGT</u> GGCATCAAAGTGGAAA   |
| Bp- XylX <i>t</i> -R | CAAGCTCGAGTCAGCCCGCGTTAAGGGAAC            |

Underlines are indicating cleavage site of restriction enzymes. *Xylt*: t- transporter.

**Table: S2-**A list of primer used for site directed mutagenesis

| Name of primer    | Sequence                                  |
|-------------------|-------------------------------------------|
| Bp- XylX 1-D371_F | TCTGTGGCTTgcaTGGCAGGC                     |
| Bp- XylX 1-D371_R | CCACGGGTACAGTGATGGAAATGGTTG               |
| Bp- XylX 1-E408_F | TATCTTTGTTgcaGTTTCCCACGGC                 |
| Bp- XylX 1-E408_R | TCCTCTGCGAGAGCCAGACC                      |
| Bp- XylX 2-D386_F | CACCTGGCTTgcaTGGCAGGC                     |
| Bp- XylX 2-D386_R | CCAAGGGTACAGTCATGGATATTATTGTTATGGATCTGTAC |
| Bp- XylX 2-E409_F | CCTGATGGTTgcaGTGACACATG                   |
| Bp- XylX 2-E409_R | TCACGGTCATTGTTGTAGTAGAGGT                 |
| LR_ XylC -D372_F  | CTTATGGTTGgcaTGGCAGGCT                    |
| LR_ XylC -D372_R  | CCACGAGTACAATGATGAATATGATTATGACGATATG     |
| LR_ XylC -E415_F  | TATGTGGATTgcaGTTTCTCATGGG                 |
| LR_ XylC -E415_R  | TCTTCCCCGAGACCAGATAAAACA                  |

Small letters indicate mutation site.

**Table S3: Expression of CAZymes related proteins when these bacteria were grown on xylo-oligosaccharides.**

| Identified proteins                                    | Accession number | MW (kDa) | <i>L. reuteri</i> 53608 | <i>L. reuteri</i> 100-23C | Signal peptide (Sec/SPI) | Homologous similarity to <i>L. reuteri</i> 53608 in <i>L. reuteri</i> 100-23C (%) | Homologous similarity to <i>L. reuteri</i> 53608 in <i>B. producta</i> ATCC 27340 (%) |
|--------------------------------------------------------|------------------|----------|-------------------------|---------------------------|--------------------------|-----------------------------------------------------------------------------------|---------------------------------------------------------------------------------------|
| Xylose isomerase                                       | A0A073JNR5_LACRE | 51       | 47                      | 39                        | No                       | 99                                                                                | ND                                                                                    |
| Putative xylosidase                                    | A0A0S4NRU4_LACRE | 77       | 51                      | 44                        | No                       | 98                                                                                | XOS-1 (59%) and XOS-2 (40%)                                                           |
| Maltose epimerase                                      | A0A143Q1I0_LACRE | 38       | 17                      | 17                        | No                       | 98                                                                                | 31                                                                                    |
| Glucohydrolase                                         | A0A0S4NKN9_LACRE | 66       | 2                       | 2                         | No                       | 98                                                                                | oligo-1,6-glucosidase (57%)                                                           |
| L-arabinose isomerase                                  | A0A098QZE8_LACRE | 54       | 26                      | 26                        | No                       | 100                                                                               | 48                                                                                    |
| Maltose phosphorylase                                  | A0A143Q1E1_LACRE | 87       | 42                      | 42                        | No                       | 99                                                                                | 33                                                                                    |
| Xylulokinase                                           | A0A073K0P2_LACRE | 56       | 24                      | 23                        | No                       | 100                                                                               | 42                                                                                    |
| Galactokinase                                          | A0A0S4NN99_LACRE | 44       | 20                      | 16                        | No                       | 99                                                                                | 45                                                                                    |
| $\beta$ -Galactosidase                                 | A0A143Q191_LACRE | 74       | 19                      | 19                        | No                       | 98                                                                                | 49                                                                                    |
| $\alpha$ -Glucosidase                                  | A0A143PYJ9_LACRE | 88       | 8                       | 33                        | No                       | 97                                                                                | 33                                                                                    |
| $\alpha$ -Galactosidase                                | A0A0S4NP55_LACRE | 84       | 29                      | 10                        | No                       | 99                                                                                | 46                                                                                    |
| $\beta$ -Galactosidase                                 | A0A0S4NQK4_LACRE | 35       | 11                      | 10                        | No                       | 98                                                                                | 34                                                                                    |
| MFS transporter                                        | A0A0S4NND3_LACRE | 34       | 19                      | 7                         | No                       | 98                                                                                | 45                                                                                    |
| $\alpha$ / $\beta$ hydrolase                           | A0A143Q035_LACRE | 28       | 9                       | 9                         | No                       | 97                                                                                | ND                                                                                    |
| Sucrose phosphorylase                                  | Q1KMT7_LACRE     | 56       | 6                       | 6                         | No                       | 99                                                                                | 27                                                                                    |
| Xylose isomerase                                       | A0A0S4NL92_LACRE | 32       | 4                       | 5                         | No                       | 98                                                                                | ND                                                                                    |
| MFS transporter                                        | A0A0S4NNZ2_LACRE | 51       | 4                       | 4                         | No                       | 99                                                                                | ND                                                                                    |
| $\alpha$ / $\beta$ - hydrolase                         | A0A0S4NN34_LACRE | 31       | 5                       | 3                         | Yes                      | 99                                                                                | ND                                                                                    |
| Putative xylose repressor (ROK family protein)         | A0A0S4NPC3_LACRE | 45       | 5                       | 4                         | No                       | 99                                                                                | 29                                                                                    |
| Glycoside-Pentoside-Hexuronide family cation symporter | A0A0S4NL78_LACRE | 71       | 5                       | 5                         | No                       | 99                                                                                | 28                                                                                    |
| ABC transporter permease                               | A0A0S4NPD1_LACRE | 55       | 5                       | 0                         | Yes                      | 99                                                                                | 43                                                                                    |
| Maltose O-acetyltransferase                            | A0A0S4NP60_LACRE | 21       | 5                       | 0                         | No                       | 97                                                                                | 42                                                                                    |

Signal peptide and homologous similarity between proteins were determined using SignalP-5.0 and the Integrated Microbial Genomes (IMG) system server respectively. ND-not-detected. In case of multiple homologous similarities, only highest shown sequence similarity was mentioned in the table. Total numbers of peptide counts are mentioned in the table.

## References

- Felsenstein J (1985) Confidence limits on phylogenies: An approach using the bootstrap. *Evolution* **39**: 783-791.
- Tyanova S, Temu T & Cox J (2016) The MaxQuant computational platform for mass spectrometry-based shotgun proteomics. *Nat Protoc* **11**: 2301-2319.
- Wessel D & Flugge UI (1984) A method for the quantitative recovery of protein in dilute solution in the presence of detergents and lipids. *Anal Biochem* **138**: 141-143.
